1 **Mapping the functional connectivity of ecosystem**  
2 **services supply across a regional landscape**

3

4 **Authors:** Rachel D. Field (corresponding author) • Lael Parrott

5

6

7

8

9

10

11 **Author's affiliation:**

12 The Okanagan Institute for Biodiversity, Resilience and Ecosystem Services

13 (BRAES)

14 Irving K. Barber School of Arts and Sciences

15 University of British Columbia, Okanagan

16 SCI 133

17 Department of Biology

18 1177 Research Road

19 Kelowna BC V1V 1V7, Canada

20 e-mail: rdsfield@gmail.com

21 phone: 250-508-0001 / fax: 250-807-8005

22

23

24

25

26 **Date of manuscript draft:** 19 May 2021

27 **Abstract**

28 Sustainably managing multifunctional landscapes for production of multiple  
29 ecosystem services (ES) requires thorough understanding of the interactions  
30 between ES and the ecological processes that drive them. We build upon  
31 landscape connectivity theory to present a spatial approach for assessing  
32 functional connections between multiple ES at the landscape scale. We  
33 demonstrate application of the approach using existing ES supply mapping data  
34 for plant agriculture, waterflow regulation, and landscape aesthetics. The  
35 connections we observed between these three ES revealed high-value  
36 multifunctional linkages on the landscape that were not necessarily predictable  
37 from supply area mapping, nor from land use or land cover data. By providing  
38 spatial information on ES connectivity, our approach enables local and regional  
39 environmental planning and management that takes full consideration of the  
40 complex, multi-scale interactions between ecological processes, land use and  
41 land cover, and ecosystem service supply on a landscape.

42 **Keywords:** ecosystem services; nature's contributions to people; multifunctional  
43 landscapes; functional connectivity; environmental planning and management.

44

45 **Introduction**

46 The rapid, human-driven modification of wilderness is reshaping land cover  
47 distribution and disconnecting natural ecosystems, which has negatively  
48 impacted biodiversity and natural resources (Foley et al. 2005, Butchart et al.  
49 2010, Foley et al. 2011). As these changes continue across the globe, ever-  
50 increasing demands are being placed on landscapes to deliver nature's  
51 contributions to people, or 'ecosystem services' (ES; Carpenter et al. 2009).  
52 These juxtaposing forces highlight an urgent need for incorporating both

53 biodiversity and ES in land use planning, with recent research calling specifically  
54 for consideration of landscape structure and connectivity in order to optimize  
55 environmental management objectives (Mitchell et al. 2013, Ekroos et al. 2014,  
56 Werling et al. 2014, Dobbs et al. 2014). The boom in ES research over the past  
57 several decades has improved our understanding of the ecological drivers  
58 underpinning the supply of ES, but more nuanced work is necessary to  
59 meaningfully manage ES provision and their interdependencies at the landscape  
60 scale (Kremen 2005, Tschamtkke et al. 2005, Nicholson et al. 2009, Daily et al.  
61 2009). Specifically, the supply of an ES is typically mapped within fixed areas  
62 (e.g., Tallis et al. 2008) without considering the potential relevance of ecological  
63 process flux across the landscape for supporting ES provisioning (e.g., Mitchell  
64 et al. 2013) and multi-ES relationships. By failing to represent the spatial and  
65 functional connectivity between supply areas in ES assessment, we ignore  
66 ecological processes that may be fundamental to the maintenance of ES  
67 supplies, run the risk of overlooking potentially critical areas in landscape-scale  
68 management, and miss opportunities for uniting divergent interest groups  
69 around the concept of multifunctional landscapes (i.e., those that provide  
70 multiple ES beyond those that are primarily managed; Power 2010). To optimize  
71 ES provisioning while minimizing potential negative effects on human well-being  
72 in the face of increased development pressures, it is critical to understand the  
73 dynamics of multi-ES supply (Lorilla et al. 2018).

74

75 Connectivity is a key attribute of landscape resilience and of ES in general (e.g.,  
76 Bennett et al. 2021). A connected landscape facilitates the movement of energy,  
77 matter, organisms, seeds, pollinators, and people, thereby supporting several  
78 ecological processes that are critical for maintaining supplies of ES (Tschamtkke

79 et al. 2005, Kremen et al. 2007, Biggs et al. 2012, Mitchell et al. 2013, Pal et al.  
80 2021). Conversely, a fragmented landscape exhibits decreased productivity,  
81 functional robustness, ecological richness (Leibold et al. 2004, Gonzalez et al.  
82 2009, Simmonds et al. 2019, Melo et al. 2019), and increased vulnerability to  
83 further human modifications (Dutta et al. 2017, Xinxin et al. 2017, Liu et al. 2017,  
84 Chi et al. 2018). Smaller patches of habitat, biotic and/or abiotic supplies are not  
85 able to support as many species or as large populations relative to larger  
86 patches (Harper et al. 2005), and loss of landscape connectivity can hinder  
87 dispersal and migration of plants and animals (Fischer et al. 2007). Such  
88 deleterious effects on the wealth of biodiversity and natural capital can lead to  
89 declines in total ES supply and in the quantity and/or quality of flows to human  
90 beneficiaries (Mitchell et al. 2015, Pal et al. 2021). Pal et al. (2021) showed  
91 specifically that fragmentation, and not just diminishment of ES supply areas,  
92 contributed to significant declines in ES values over time. Landscape  
93 fragmentation impacts the supply of ES through altering the distribution and  
94 movement of the ecological elements, structures and processes underpinning  
95 the maintenance of natural capital (Mitchell et al. 2015). Mitchell et al. (2015)  
96 discuss how loss of connectivity can be a driver of interactions between multiple  
97 ES and can impact both the size and location of ES flows (Bagstad et al. 2013).  
98 Among key policy principles identified for enhancing ES resilience to  
99 disturbances and environmental changes is managing for connectivity among  
100 ES-related resources, species, and human actors, with specific focus on the  
101 strength and structure of these connections (Biggs et al. 2012). All this points to  
102 the importance of planning for connectivity in multifunctional landscapes  
103 (Phillips et al. 2015), while considering the potential for complex ecological

104 process-based interactions among services, to successfully manage for the  
105 delivery of multiple ES (Dee et al. 2017).  
106  
107 In simple terms, planning for landscape connectivity typically focuses on habitat  
108 patches and movement corridors, whereas ES planning focuses on the areas of  
109 the landscape with the capacity to produce the services humans need to survive  
110 and thrive (Taylor et al. 1993, Egoh et al. 2008). Recent work calling explicitly for  
111 incorporating ES into connectivity research has taken the perspective of  
112 assessing how the characteristics of landscape connectivity (i.e., how a  
113 landscape promotes or hinders movement of matter and organisms), along with  
114 composition (i.e., quantities of land use and land cover, or 'LULC', types), and  
115 configuration (i.e., spatial pattern of LULC), might directly or indirectly impact ES  
116 provision and related ecological processes (Debinski and Holt 2000, Fahrig  
117 2003, Gonzales et al. 2009, Mitchell et al. 2013). For example, adequate  
118 arrangement of adjacent natural habitat areas in agricultural landscapes can aid  
119 the movement of pollinators and pest predators to croplands, and thus promote  
120 delivery of these services (Priess et al. 2007, Ricketts et al. 2008, Fleischner  
121 1994, Tscharntke and Brandl 2004; Kremen et al. 2007, Tallis and Polasky 2009,  
122 Power 2010, Lonsdorf et al. 2011). Habitat loss, fragmentation, and  
123 management strategies detrimental to related connectivity can have the  
124 opposite effect on pollinators (e.g., Kremen et al. 2002, Potts et al. 2010,  
125 Mitchell et al. 2013)., whereas increased connectivity in croplands can facilitate  
126 pest dispersal (Margosian et al. 2009). In terms of abiotic flows, connections  
127 between upstream and downstream freshwater sources can be important for  
128 maintaining quantity and quality of drinking water (Dodds and Oakes 2008,  
129 Bangash et al. 2013), and maintenance of the natural hydrologic regime

130 stabilizes base flows and reduces flooding, thereby promoting waterflow  
131 regulation (Poff et al. 1997). Viewing the attributes of structural and functional  
132 connectivity in these ways, i.e., from the perspective of ES, helps to move  
133 beyond the idea of managing for spatially discrete ES supply areas and toward  
134 garnering better understanding of how we might manipulate certain connectivity  
135 elements (e.g., habitat patch area, isolation distance, movement corridors) to  
136 more effectively manage a landscape for individual ES (Mitchell et al. 2013). The  
137 above examples highlight that the ecological processes underpinning the  
138 supplies of certain ES directly influence the supplies of others, both when  
139 services co-occur in space and, sometimes, when they are produced in separate  
140 areas. Drivers behind multi-ES interactions, and the importance of such  
141 processes, are sometimes discussed in ES interaction research (e.g., Li et al.  
142 2017, Alemu et al. 2020) but, to our knowledge, have not been explicitly  
143 delineated on the landscape in the context of multi-ES assessments. To truly  
144 understand the relevance of landscape connectivity to ES, we must ask: what  
145 and where are the mechanisms responsible for maintaining these connections  
146 and, consequently, supporting the production of multiple ES?

147

148 Since the seminal global appraisal of ecosystems and the ES they provide (MEA  
149 2005), research that assesses the *interactions* between multiple services has  
150 increased exponentially (Agudelo et al. 2020; Appendix 1). However, research in  
151 this discipline commonly only considers services that co-occur in space (e.g.,  
152 Queiroz et al. 2015), and assumes positively or negatively correlated ES to  
153 represent synergistic production or trade-offs, respectively (Tomscha and Gergel  
154 2016, Agudelo et al. 2020). Such assessments are typically based on correlation  
155 coefficients of indicators aggregated within a geographic unit (e.g., watershed,

156 municipality) or randomly sampled across a region (Anderson et al. 2009, Qin et  
157 al. 2015, Qiu and Turner 2015). These approaches do not directly evaluate  
158 interactions based on underlying ecological process theory nor do they allow for  
159 spatially discrete relationships to occur, i.e., they do not explicitly incorporate  
160 the mechanisms responsible for ES interactions, and they ignore how ES  
161 occurring in one area might have direct or indirect influence on ES in other  
162 areas. It has also been shown that simple spatial correlation analyses between  
163 pairs of ES are not necessarily a good predictor of how relationships between ES  
164 change over time (Mitchell et al. 2020), and that their interactions can vary  
165 across the LULC types found in heterogeneous landscapes (Li et al. 2017); thus,  
166 a better understanding of the processes that underpin the spatial patterns of ES  
167 is needed to improve the sustainable management of multifunctional landscapes  
168 (Mitchell et al. 2020). Recent research has visualized the spatial connectivity  
169 between ES supply areas by modelling the movement potential of species  
170 through high quality habitat corridors as a proxy for how biodiversity flow in  
171 general supports ES provisioning across the landscape (Peng et al. 2018). Still,  
172 this does not represent different functional connections between ES supply, and  
173 how the provisioning of one type of ES directly or indirectly effects the  
174 provisioning of another across a landscape. Further, a recent systematic review  
175 of studies that model interactions among multiple ES between 2005 and 2019  
176 found that the vast majority of studies were conducted locally while relatively  
177 few studies were done at the regional scale (Agudelo et al. 2020). However,  
178 focus at the regional level may be most appropriate for reconciling the common  
179 scale mismatches between biophysical and socio-economic elements involved in  
180 sustainable ES management (e.g., Dalgaard et al. 2003, Cumming et al. 2006,  
181 Satake et al. 2008, Ingram et al. 2008), while minimizing practical issues with

182 empirical mapping related to data gaps and indicator variability in areas larger  
183 than this (Verberg and Chen 2000; but see de Groot et al. (2010) for examples of  
184 variability in ecological scale relevance for specific ES). However, as this relates  
185 to *interactions* between different ES, small-scale observations may be masked at  
186 larger scales (Raudsepp-Hearne and Peterson 2016); therefore, incorporating  
187 local, grid-level data and analyses is important for providing meaningful  
188 information to planners (Haase et al. 2012).

189

190 In spite of the growing knowledge around the complex interactions and  
191 feedbacks between ES and the related suite of biotic and abiotic mechanisms  
192 and the cruciality of incorporating this into decision-making (Qiu and Turner  
193 2013, Dee et al. 2017), spatial modelling of the diverse functional connections  
194 between multiple ES (e.g., Cui et al. 2012, Kolosz et al. 2018, Agudelo et al.  
195 2020) from several broad ES categories at the regional scale remains limited  
196 (Field et al. 2017). Several approaches used in ecological connectivity studies to  
197 identify potential spatial linkages across a landscape are promising in their  
198 applicability multi-ES assessment. These include euclidean distances (Cressie et  
199 al. 1993), least-cost path analysis (LCP; Larkin et al. 2004), least-cost corridor  
200 (LCC; Singleton et al. 2002), circuit theory (McRae & Beier 2007), graph theory  
201 (Pinto & Keitt 2009), and network flow models (Phillips et al. 2008). All these  
202 approaches are potentially amenable to assessment of multi-ES interactions but,  
203 to date, we know of no studies that have applied such methods to map the  
204 process-driven interactions between the supplies of multiple ES in a regional  
205 context (Peng et al. 2018). Further, studies that have incorporated both  
206 landscape connectivity and ES concepts typically only focus on a single ES, are  
207 skewed toward specific types of provisioning (e.g., food) and regulating (e.g.,



208 pollination) services, and, to our knowledge, have not yet tested cultural services  
209 (Mitchell et al. 2013).

210

211 We present an approach to address the above research gaps, building on  
212 existing ES mapping and modelling and rooted in landscape connectivity  
213 theory, to demonstrate how the functional relationships between multiple ES  
214 can be represented in the context of connectivity planning across a regional  
215 heterogeneous landscape. We demonstrate our approach using existing grid-  
216 level data from a case study landscape in the southern interior of British  
217 Columbia, Canada, by mapping and assessing the connectivity between ES from  
218 three broad categories: provisioning (plant food agriculture), regulating  
219 (waterflow regulation), and cultural (landscape aesthetics; MEA 2005). Using  
220 these, we conceptualize ES supply areas as structural components, and the  
221 functional process links between these areas as configuration elements within a  
222 landscape connectivity framework. We base our approach on existing, and  
223 relatively straightforward, spatially co-occurring ES interaction and LCP corridor  
224 methods to present a first step toward representing functional connectivity  
225 between multiple ES. Our multi-step approach has three specific objectives: (1)  
226 to define the ecological process-based connectivity mechanisms between  
227 different types of ES supply; (2) to spatially map and quantify these connections  
228 while accounting for LULC heterogeneity; (3) to compare coverages of supply  
229 areas and functional connections across different types of LULC.

230

### 231 **Materials and methods**

232 Our case study area spans the Okanagan region in British Columbia (BC),  
233 Canada, which we use to demonstrate a multi-ES connectivity mapping

234 approach for informing landscape planning (Fig. 1). It is located in the south-  
235 central interior of BC, is Canada's biodiversity hotspot and one of North  
236 America's most endangered semi-arid ecoregions (Warman et al. 2004, Kerr and  
237 Cihlar 2004), has a highly diverse assemblage of land use types (see Caslys  
238 2013), and covers 21,580 km<sup>2</sup> from ~276 to 2,774 masl. General LULC types in  
239 the region include, in decreasing order of area: forests (16,281 km<sup>2</sup>), grasslands  
240 (1,482 km<sup>2</sup>), natural parks (2,403 km<sup>2</sup>; NB: contains several of the other listed  
241 LULC categories), shrubs (1,349 km<sup>2</sup>), agricultural (842 km<sup>2</sup>), lakes (599 km<sup>2</sup>),  
242 urban residential (220 km<sup>2</sup>), rural residential (220 km<sup>2</sup>), wetlands (182 km<sup>2</sup>),  
243 rock/rubble (161 km<sup>2</sup>), exposed land (113 km<sup>2</sup>), manicured parks (45 km<sup>2</sup>), rivers  
244 (38 km<sup>2</sup>), commercial (23 km<sup>2</sup>), industrial (23 km<sup>2</sup>), urban institutional (16 km<sup>2</sup>),  
245 and reservoirs (6 km<sup>2</sup>; Field et al. 2017). The ES-related resources in the region  
246 are governed by over 80 institutions at federal, provincial, regional district, First  
247 Nations, and municipal levels. Our study area has strong engagement of  
248 regional government and non-government stakeholders, and an increasing  
249 demand for region-wide collaboration in land use planning to accommodate  
250 rapid rates of land development in response to a high rate of human population  
251 growth (Neale et al. 2007, Caslys 2013).  
252

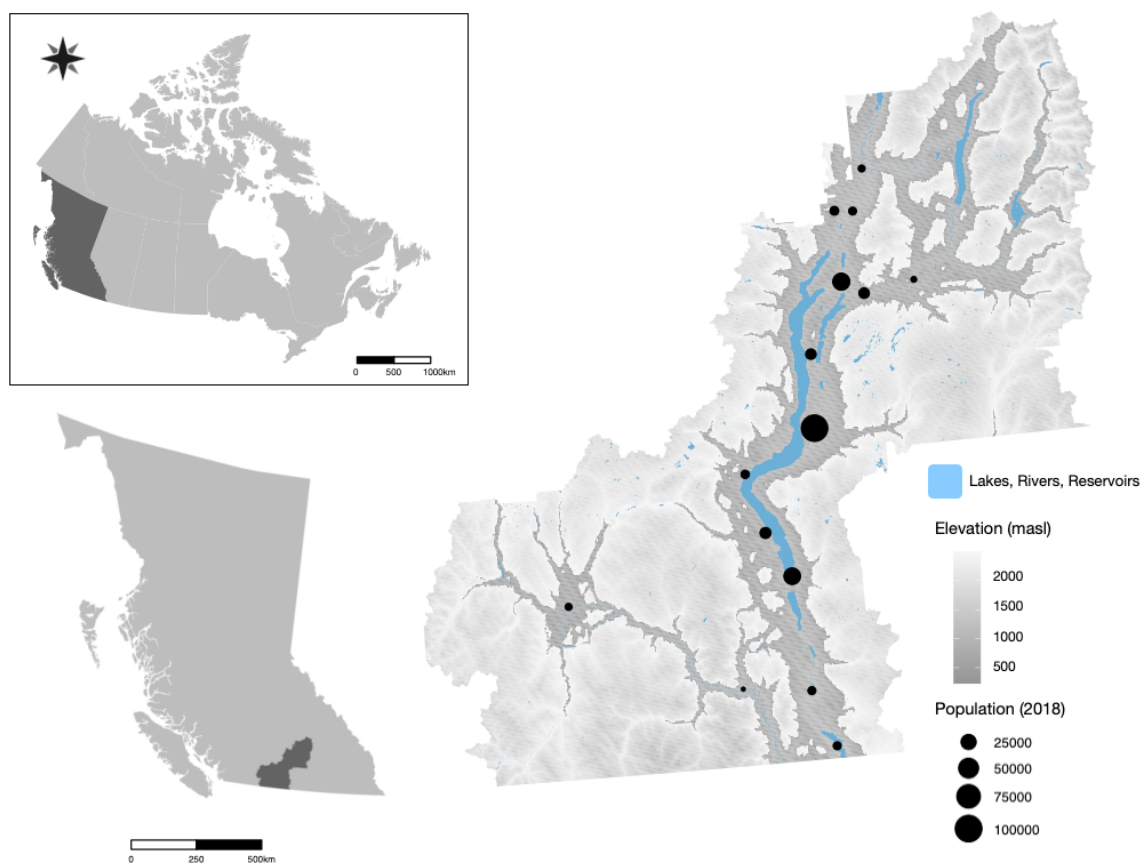

253

254 Figure 1. Location of the case study landscape in southern interior 'Okanagan'  
255 region of British Columbia, Canada. Major waterbodies, elevation (masl), and  
256 the most populous cities and towns in Okanagan regional districts are indicated.

257

258 We obtained spatial data for these ES from existing maps produced for our  
259 study area (Fig. 2; Field et al. 2017, Field 2021). Based on these data, we first  
260 established and valued *supply* area polygons - defined as spatially identifiable  
261 regions of higher-than-average-value supply potential - which serve as source  
262 and destination patches in a connectivity network (Appendix 1). We then  
263 developed a methodology to establish and value functional linkages, or  
264 connectivity, between supply areas. Functional connections were of two broad  
265 types: (1) *overlapping* links, which were areas where the supplies of two different

266 types of ES occur in the same place, and there is an underlying process-based  
267 connection between them; and (2) *topographic* links, which were mapped based  
268 on the ecological processes that functionally connect the supplies of two ES  
269 areas separated in space. Lastly, we compared the coverage of top-value ES  
270 supplies and their linkages on the major LULC types found in the region.  
271

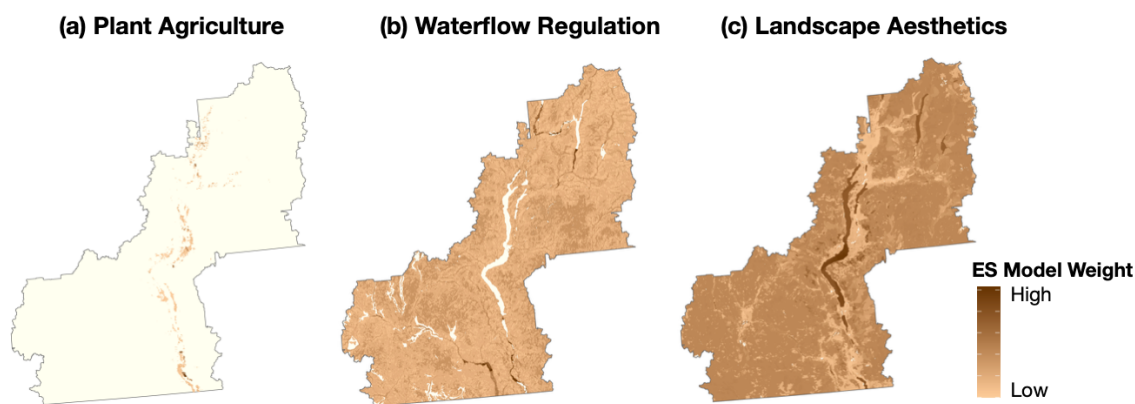

272  
273 Figure 2. Maps showing the original, full-extent of distribution and weighting for  
274 ES supply areas in the case study landscape, including (a) plant food agriculture,  
275 (b) waterflow regulation, and (c) landscape aesthetics (Field et al. 2017).

276

### 277 *Mapping and valuing ES supply patches*

278 To spatially partition the landscape into ES supply areas and establish the links  
279 between them, we developed a rationale based on interdisciplinary methods for  
280 assessing complex and connected natural systems (Bialonski et al. 2010). From  
281 the perspective of the landscapes' capacity to provide ES, we defined  
282 subsystems as discrete areas with the greatest potential for providing ES supply,  
283 while the functional interdependencies between such areas were represented by  
284 spatial connections (also referred to herein as 'links' or 'corridors'). We  
285 delineated ES supply areas based on approaches used in landscape connectivity  
286 and ES mapping studies: spatial polygons that represent high-value supply ES

287 patch boundaries (e.g., Bangash et al. 2013); and the aggregation of  
288 immediately adjacent clusters of high-value supply spatial grid cells (e.g.,  
289 Gardner 1999, Urban et al. 2009, Qiu and Turner 2013; Field and Parrott 2017).  
290 Any areas either lacking the potential for ES supply, or below a high-value  
291 supply threshold (details below), were represented as the landscape matrix  
292 through which ecological process-based connections between supply areas  
293 could flow (Field and Parrott 2017). In reality, such spatial interaction networks  
294 are dynamic through time (Boesing et al. 2020), though here we consider a static  
295 snapshot of the present state of ES supply in our study region in an effort to  
296 clearly illustrate real-world application of a novel approach for mapping the  
297 ecological relationships underpinning multiple types of ES supply.

298

299 For the purposes of demonstrating our concept, we used existing data on the  
300 spatial distribution of the 'supply' of three ES: (1) plant agriculture ('PA' herein;  
301 provisioning = products obtained from ecosystems); (2) waterflow regulation  
302 ('WF'; regulating = abiotic and biotic processes that moderate natural  
303 phenomena); and landscape aesthetics ('LA'; cultural = non-material  
304 characteristics that benefit human well-being; MEA 2005). Supply area maps  
305 were created using tools centred on ecological composition (biotic and abiotic  
306 elements), structure (e.g., topography, LULC distribution; Wallace 2007),  
307 processes (e.g., water infiltration, nutrient cycle, energy cycle; Lyons et al. 2005),  
308 and/or actual ES, and created primarily using existing and/or publicly available  
309 data. All data were resampled to ~29 m x 29 m grid cells; therefore, ES models  
310 accounted for fine-scale heterogeneity of parameters across the landscape. We  
311 summarize the methods used for mapping the three (3) ES used in our study in  
312 Appendix 2 (Field 2021). Additional details are outlined in Field et al. (2017).

313

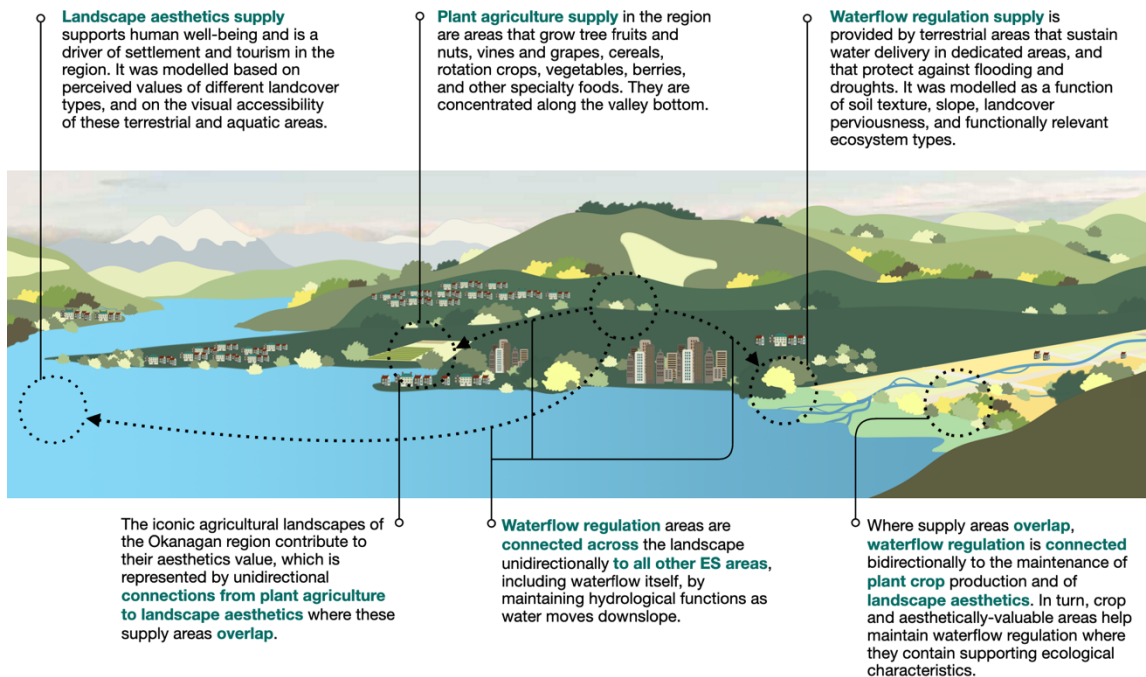

314

315 Figure 3. Schematic and definitions for ES supply areas and functional

316 connections in the case study landscape.

317

318 Studies that consider multiple ES have found that the distribution of at least one  
319 ES may be ubiquitous across a regional landscape (e.g., Queiroz et al. 2015),  
320 and/or isolated supply areas may be present within a non-ES-provisioning matrix  
321 (e.g., Qiu and Turner 2013; Fig. 2). Both situations were true for our landscape  
322 based on the ES selected, so for the purposes of creating supply areas, we  
323 chose to only retain areas with supply values above a top 50% threshold. This  
324 was because two of the ES types we selected, WF and LA, had near-ubiquitous  
325 spatial coverage with values ranging from very low to very high, and because  
326 management applications often are most interested in maintaining the highest-  
327 value provisioning areas (e.g., Turner et al. 2007). For PA, we subset the top  
328 50%-valued polygons from the original mapping; for WF and LA, we subset the

329 top 50%-valued raster cells of each of the regional ES maps, then converted  
330 these cells to single-part polygons based on aggregating adjacent cells within a  
331 diagonal raster cell width (~29 m). Note that, due to the large file size of the WF  
332 data, the above was run separately for each sub-basin (n = 118) in our study area  
333 (see Appendix 3 for details). Aggregated areas became supply area polygons,  
334 and were valued based on the summed raster values therein, then normalized  
335 on a unit-less scale from 1 to 10000.

336

### 337 *Establishing functional connections between ES supplies*

338 We define *ES connectivity* as areas on the landscape where one ES supply area  
339 influences the provisioning of another via underlying ecological processes. We  
340 identified spatial interactions between ES supply areas either as those that are  
341 connected through their overlap in space, or those that transverse the landscape  
342 through the relatively low value (i.e., sub-50% threshold) ES matrix. For these  
343 two cases respectively, we applied spatial overlay analysis (e.g., Qiu and Turner  
344 2013), or identified flows using a stepwise procedure involving least-cost path  
345 (LCP) analyses akin to those applied in wildlife connectivity studies based on  
346 species movement and habitat attributes (Urban et al. 2009). Movement of  
347 organisms and matter across a landscape is often specifically defined in a single  
348 direction as a result of biophysical (e.g., waterflow, topography) or biological  
349 (e.g., movement from source to destination areas) realities, with multiple link  
350 types representing qualitatively unique flows that exist between patches (Zhang  
351 et al. 2007, Urban et al. 2009). For example, an area on the landscape producing  
352 multiple ES supply types may have functional links between ES of the same type  
353 in different locations, between different ES types in the same location, or with  
354 different ES types in different locations (Fig. 4).



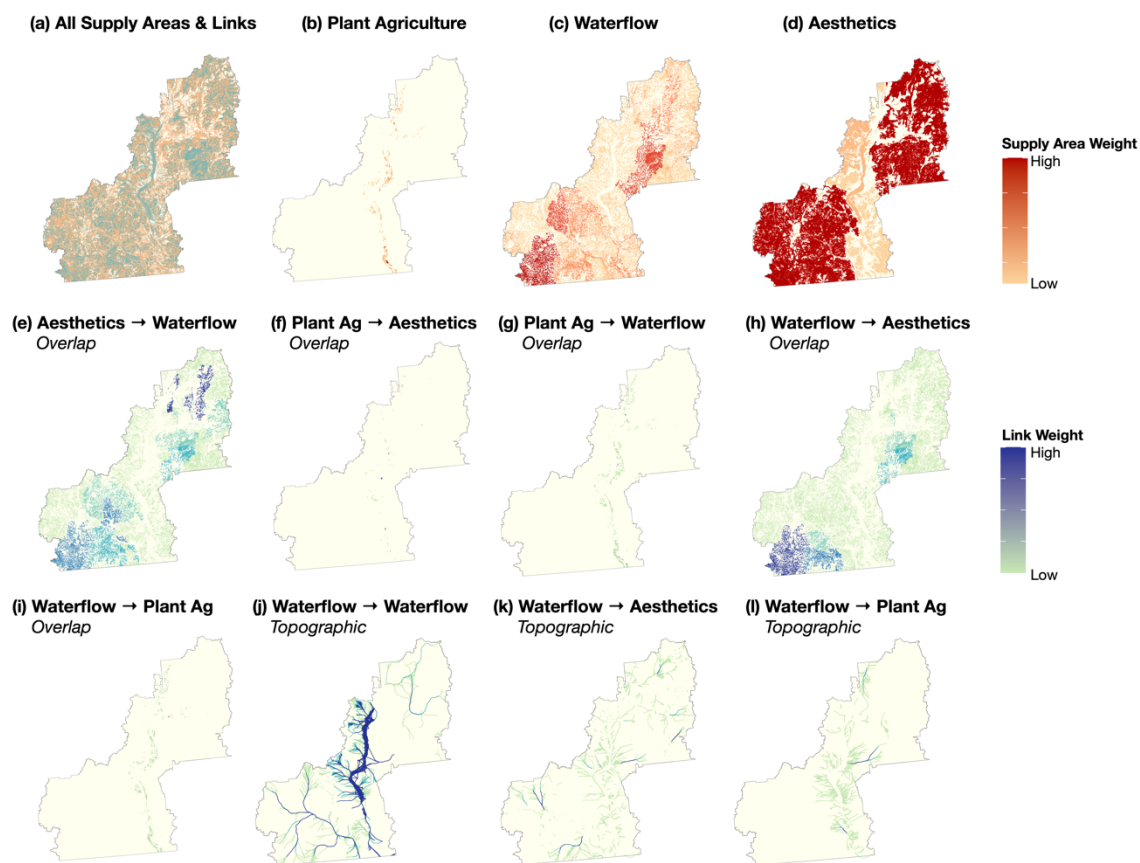

355

356 Figure 4. Conceptual schematic showing the functional connections between  
357 WF (purple), PA (green) and LA (orange) supply areas on a subset area of the  
358 case study landscape. All eight link types (topographic and overlapping)  
359 represented in our case study approach are differentiated by colour-coding, and  
360 weighted by thickness gradient. ES supply areas and links are nested within a  
361 non- or low-value landscape matrix (white area). Adapted from Ernstson et al.  
362 (2010) and Field and Parrott (2017).

363

364 For the three ES we considered in this study, we characterized eight (8) spatial  
365 link types by the directional, ecological process-based relationships between  
366 high-value ES supply areas. The rationale behind these connectivity mechanisms  
367 are summarized in Table 1. As connection model distribution and valuations



368 were based on the original fine-scale supply area mapping, they also accounted  
369 for model parameter heterogeneity across the study area. We identified two  
370 high-level types of connections: overlapping ( $n = 5$ ) and topographic ( $n = 3$ ).  
371 *Overlapping* links were defined as areas where the supplies of two different  
372 types of ES occur in the same location on the landscape, and there is an  
373 underlying process-based connection between the two. For PA, the presence of  
374 vegetation crops can contribute to WF through providing a variety of beneficial  
375 ecological properties (e.g., soil texture, low-slope, high-perviousness,  
376 floodplains, riparian areas, and seasonally flooded fields; Power 2010), though  
377 the weight of this positive interaction may be higher if agricultural land was  
378 allowed to return to a natural vegetated state (Roa-García et al. 2011). PA also  
379 interacts with LA by providing farmland that is recognized as being aesthetically  
380 valuable (e.g., vineyards; Wagner and White 2009, Field et al. 2017) where these  
381 areas overlap. For WF, a direct positive influence stems from the spatial  
382 confluence of high-value WF areas on PA and LA supply areas through the  
383 maintenance of underlying hydrological processes where they co-occur (e.g., De  
384 Laney 1995, Nelson et al. 2009, Seavy et al. 2009). In the other direction, high-  
385 value terrestrial LA supply areas can be linked to WF areas through supportive  
386 ecological functions (e.g., pervious and water-retaining vegetated landscapes,  
387 floodplains in populated areas; Boyd and Banzhaff 2007, Van der Ploeg et al.  
388 2010, Berkel and Verburg 2012, Carpenter et al. 2015; Table 1). We used the  
389 high-value ES supply area maps (Fig. 5b-c,d) to identify areas where each pair of  
390 ES overlapped (directionally) based on the above theory using a GIS-based clip  
391 procedure (see Appendix 4 for step-by-step details; Field 2021). The resulting  
392 single-part polygons of overlapping links represented the ecological processes  
393 connections between spatially co-occurring ES types (Fig. 5e-i).

394

395 Table 1. Rationale behind functional connection mechanisms, directionality, and  
 396 weighting between top-value ES supply areas.

|               |                      | Supply Areas                                           |                                                                                                                     |                                                                                                                                           |                                                                                                      |
|---------------|----------------------|--------------------------------------------------------|---------------------------------------------------------------------------------------------------------------------|-------------------------------------------------------------------------------------------------------------------------------------------|------------------------------------------------------------------------------------------------------|
| linked from → | Link Type            | Plant Agriculture (PA)                                 | Waterflow Regulation (WF)                                                                                           | Landscape Aesthetics (LA)                                                                                                                 |                                                                                                      |
| linked to ↓   |                      | <i>supply area weight: potential PA crop area (ha)</i> | <i>supply area weight: summed WF model value</i>                                                                    | <i>supply area weight: area (ha) x LA model value</i>                                                                                     |                                                                                                      |
| Supply Areas  | Plant Agriculture    | Overlap                                                | None                                                                                                                | WF regulation on PA croplands<br><i>link weight: summed WF model supply area values within PA supply area</i>                             | <i>Other direction</i>                                                                               |
|               |                      | Topographic                                            | None                                                                                                                | WF regulation downslope<br><i>link weight: summed WF model values along LCP pathway from WF to PA supply area</i>                         | None                                                                                                 |
|               | Waterflow Regulation | Overlap                                                | PA croplands providing WF regulation<br><i>link weight: all summed WF model values within entire PA supply area</i> | None                                                                                                                                      | LA areas providing WF regulation<br><i>link weight: summed WF model values within LA supply area</i> |
|               |                      | Topographic                                            | <i>Other direction</i>                                                                                              | WF regulation downslope<br><i>link weight: summed WF model values along LCP pathway from WF<sub>1</sub> to WF<sub>2</sub> supply area</i> | <i>Other direction</i>                                                                               |
|               | Landscape Aesthetics | Overlap                                                | PA cropland providing LA<br><i>link weight: summed LA model values within PA supply area</i>                        | WF regulation on LA areas<br><i>link weight: summed WF model supply area values within LA supply area</i>                                 | None                                                                                                 |
|               |                      | Topographic                                            | None                                                                                                                | WF regulation downslope<br><i>link weight: summed WF model values along LCP pathway from WF to LA supply area</i>                         |                                                                                                      |

397

398

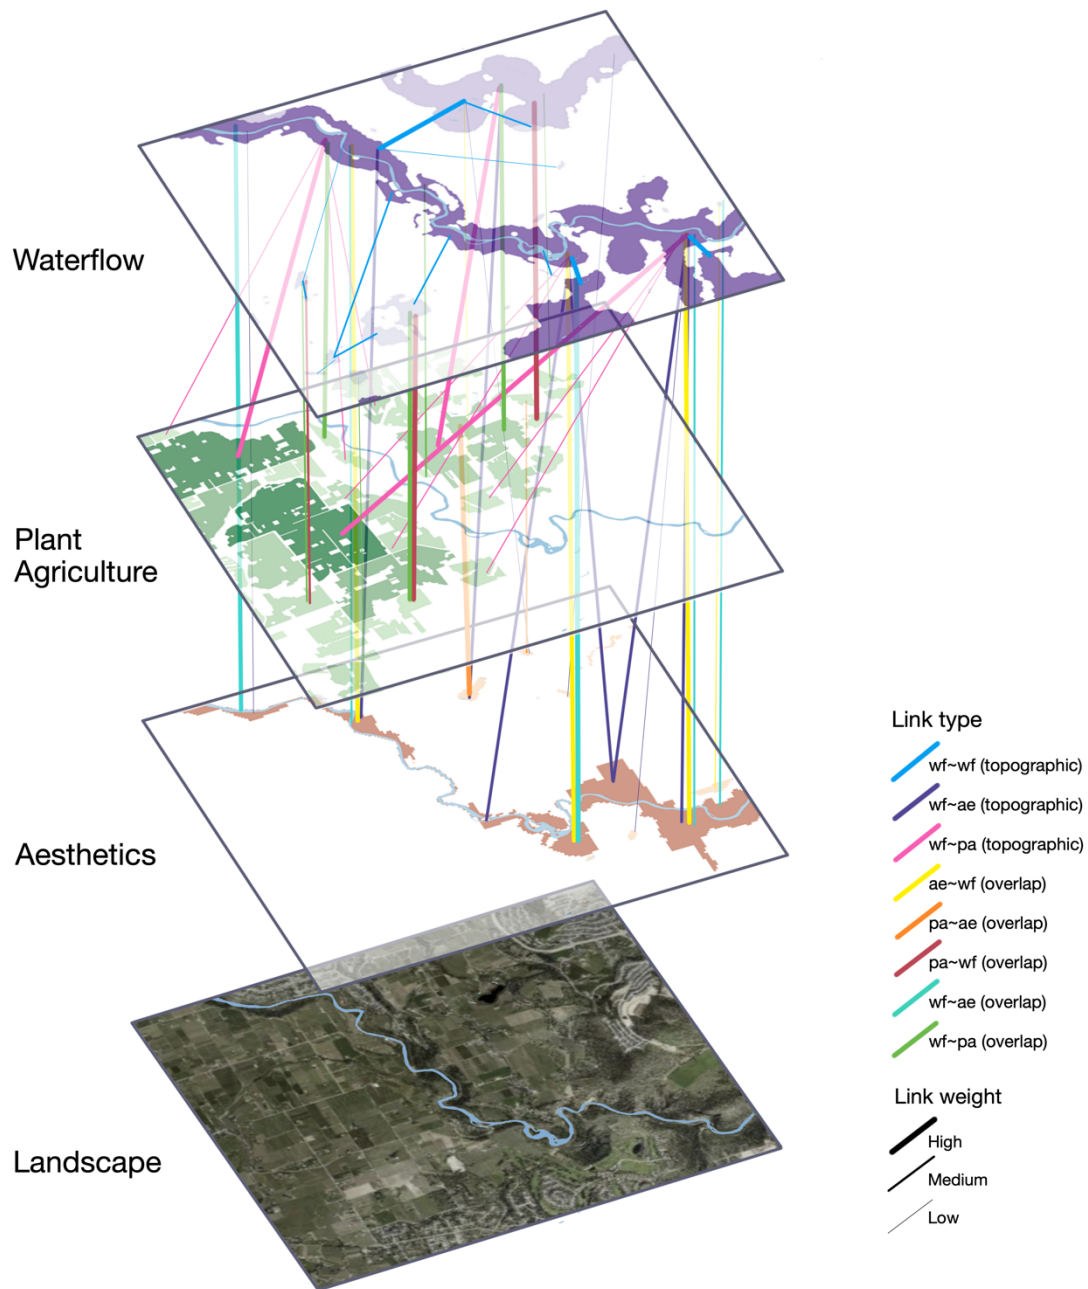

399

400 Figure 5. Distribution and weighting of top-50%-valued ES supply areas and  
401 functional connections on the case study landscape. Insets show (a) all top-value  
402 supply areas and links; top-value supply areas for (b) plant food agriculture (PA),  
403 (c) waterflow regulation (WF), and (d) landscape aesthetics (LA); overlapping  
404 connections from (e) LA to WF, (f) PA to LA, (g) PA to WF, (h) WF to LA, and (i)

405 WF to PA; and topographic connections from (j) WF to WF, (k) WF to PA, and (l)  
406 WF to LA.

407

408 *Topographic* links were based on the ecological processes that functionally  
409 connect the supplies of two spatially separated ES areas across the landscape.  
410 Based on the three ES we considered, topographic connections always originate  
411 at a WF supply area, and represent the influence of upslope water regulation on  
412 the maintenance of the natural hydrologic processes that help support PA (e.g.,  
413 crop growth and nutrient retention; De Laney 1995, Nelson et al. 2009), WF  
414 (e.g., natural baseline flow regulation; Nelson et al. 2009), and LA (e.g.,  
415 maintenance of hydrology-dependent vegetation and aquatic features deemed  
416 to have high aesthetic value) supplies in downslope areas. We developed a  
417 stepwise procedure to create topographic links between ES supply areas. First, a  
418 separate least cost path (LCP) analysis was run for each WF supply area polygon  
419 to identify link corridors between these and other ES supply areas (Fig 6a). LCP  
420 analysis is a common method of mapping directional ecological corridors in  
421 landscape connectivity research, where the movement of an organism (or abiotic  
422 unit) is simulated across a resistance (cost) surface from a start to a destination  
423 point, and the lowest-accumulated resistance becomes the most likely path it  
424 will follow across a landscape (Beier et al. 2009). LCP can also be effectively  
425 used for hydrological flow models, where the algorithm seeks to minimize  
426 cumulative elevation along its path (e.g., Melles et al. 2011). The starting WF  
427 supply area polygon centroid was used as the 'origin' point for each associated  
428 LCP analysis. A single LCP 'goal' point was determined for each sub-basin by  
429 identifying the basin stream outlet (FLNRO 2017); the LCP goal point  
430 coordinates were identified as the intersect of this stream line feature and the

431 valley-bottom line feature of the associated major watershed (Appendix 3; Field  
432 2021). If multiple outlets were present in a sub-basin (e.g., Okanagan sub-basin  
433 'w11213'), the furthest downstream outlet line feature was used. LCP transition  
434 functions were built based on the assumption of downslope waterflow over a  
435 DEM surface, and allowed for connecting to a 16-cell neighbourhood to avoid  
436 paths being terminated based only on a single depression cell (van Etten 2017).  
437 Following this, we executed various procedures to produce topographic  
438 corridors between pairs of supply areas, which we summarize in Figure 6. This,  
439 along with approaches used to address other analytical nuances, are also  
440 discussed in Appendix 4.  
441

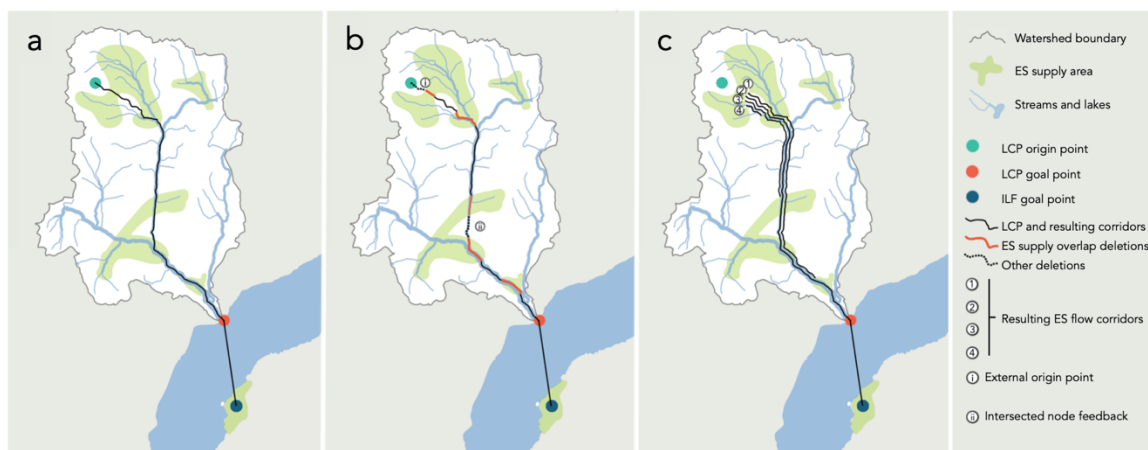

442  
443 Figure 6. Schematic outlining steps for the creation of topographic ES corridors  
444 from each origin ES supply area to downslope supply areas. (a) An initial line  
445 feature resulting from a least cost path (LCP) analysis, i.e., from the origin to the  
446 goal point, amalgamated with a line from the goal point to a downstream  
447 influential landscape feature (ILF). (b) Types of LCP segment deletions  
448 addressed, including (red) segments overlapped by ES supply area polygons, (i)  
449 segments from origin points external to origin ES polygon, and (ii) segments  
450 flowing between two areas of an intersected (i.e., non-origin) ES supply area. (c)

451 Resulting ES flow corridors after deletions, including feedbacks to origin ES  
452 supply area (4), flows to downslope ES supply areas (1) and (3), and flows to  
453 downstream ILF areas (2).

454

455 We then identified influential landscape features (ILFs) as additional WF  
456 polygons downstream of each sub-basin in the valley-bottom and associated  
457 with wetlands, floodplains, riparian areas, and/or seasonally flooded fields,  
458 which are functionally linked to upstream hydrological regulation. We connected  
459 ILFs to each upstream sub-basin outlet point, and individually merged these  
460 sub-basin lines with the LCPs for each WF supply area within that sub-basin (Fig.  
461 6). Additionally, if a sub-basin flowed into a lake or reservoir, all ILF polygons  
462 immediately adjacent to that waterbody were included in the list of  
463 'downstream' supply areas. Lastly, because the DEM raster resolution was  
464 approximately 20 m, some LCPs flowed outside sub-basin boundaries between  
465 the origin polygon (typically those close to a sub-basin boundary) and the goal  
466 point. Any nodes outside the sub-basin of interest that were overlapped by such  
467 LCPs were not considered to be true 'intersections' and such line segments  
468 were therefore excluded from within sub-basin links. However, such LCPs were  
469 still able to become connected to downstream ILFs.

470

471 *Assigning value to the functional connectivity between ES*

472 In addition to spatially identifying connections between pairs of ES, we  
473 quantified the weight of these connections based on assumptions around the  
474 functional relationships between ES (e.g., Urban et al. 2009). We based  
475 valuations on the original ES provisioning maps, which assigned each raster cell  
476 in the map an ES value equivalent to results of the underlying models (Appendix

477 2; Field 2021; Field et al. 2017), and on the following assumptions. Since some  
478 of the ecological characteristics of both PA and AE areas can support the  
479 maintenance of WF supply, and high-value WF lands maintain the hydrological  
480 characteristics that help support PA provision and AE, we assumed that the  
481 value of these connections would approximate the available WF capacity.  
482 Therefore, the overlapping links between WF and PA, and between WF and LA,  
483 were weighted by the summed WF raster values therein. The plant food-  
484 providing agricultural areas of the Okanagan are prized by some for their beauty  
485 (Wagner and White 2009; though this subjective evaluation is complicated, see  
486 Wagner 2008), and we assumed the level of this significance to be equivalent to  
487 the underlying LA model value; therefore, such overlap links were  
488 unidirectionally weighted from PA to LA by the summed LA raster values therein.  
489 We assumed the contribution of upslope, high-value WF lands to the hydrologic  
490 maintenance of intersected downslope PA, WF and LA areas to be equivalent to  
491 the amount of flow regulation provided by landscape where water flows  
492 between these areas. Therefore, we quantified the weight of these unidirectional  
493 links by the cumulative value of all WF raster cells on the original map (i.e., not  
494 just top 50%; Fig X B original ES maps) traversed along corridors. All link  
495 weights were obtained by extracting summed raster cell values coincident with  
496 overlap link areas or with topographic link segments, then normalized on a unit-  
497 less scale from 1 to 10000. Additionally, raster overlay analysis was conducted,  
498 wherein cell values were summed across all eight link types to produce a  
499 weighted distribution map of all multi-ES connections for our entire study  
500 region. We acknowledge that alternative ecological process models could be  
501 used to produce more nuanced or accurate measures of link weightings (e.g.,  
502 Cadotte et al. 2011). However, we chose to base our link quantification on high-

503 level and readily calculable assumptions in an effort to provide simple,  
504 replicable, and easily-communicated metrics to inform applied decision-making  
505 for corridor, conservation, and protected area placement.

506

#### 507 *Comparison with regional LULC*

508 To compare the spatial coverage of supply areas and their linkages, and to aid  
509 in our assessment of potential uses of ES connectivity results for on-the-ground  
510 planning and management, we calculated the proportion of several high-level  
511 LULC categories intersected by each of the high-value supply areas and eight  
512 link types identified in the above analyses. We selected several LULC categories  
513 to provide both local and regional decision-makers additional information about  
514 where on the landscape ES connectivity is distributed, including forests,  
515 grasslands, shrubs, parks, aquatic areas, wetlands, rock and exposed land,  
516 agriculture, residential, and urban areas. We calculated the total area (ha and %)  
517 of LULC types covered by each link type, and the proportions of study area total  
518 LULC covered by each link.

519

520 ArcMap 10.7.1 (ESRI 2011) and R (version 3.6.2; R Development Core Team  
521 2017) packages `sp` 1.4-5 (Pebesma and Bivand 2005, Bivand et al. 2013), `sf`  
522 0.9-8 (Pebesma 2018), `rgdal` 1.5-23 (Bivand et al. 2015), `raster` 3.4-5 (Hijmans  
523 and van Etten 2012), `rgeos` 0.5-5 (Bivand et al. 2017), `maptools` 1.1-1 (Lewin-  
524 Koh et al. 2012), and `stringr` 1.4.0 (Wickham 2010) were used to build, assess  
525 and visualize the ES connectivity map. LCP analyses and subsequent stepwise  
526 link refinement were run using R package `gdistance` 1.3-6 (van Etten 2017).  
527 For transparency and reproducibility, data, R scripts and further details on our



528 methodological procedures are available on the Open Science Framework (OSF;  
529 Field 2021; Appendix 5); limitations are discussed in Appendix 6.

530

## 531 **Results**

### 532 *Distribution and values of ES supply areas*

533 The top-valued 50% supply areas were distributed north-to-south across our  
534 study region (Fig. 5b-d). Plant foods are grown primarily in valley bottom areas  
535 in the Okanagan, and thus PA supply areas ( $n = 1,497$ ) were concentrated in  
536 lower-elevation and population-dense regions with similar coverage to the  
537 original PA map (distribution of specific crop types detailed in Field et al. 2017).  
538 The highest-value PA supply areas were coincident with the largest farm parcels,  
539 present in the agriculture-rich areas of the south, north and east-central  
540 Okanagan. Given the extensive coverage of their original model results, top-  
541 value supply areas for both WF ( $n = 7,350$ ) and LA ( $n = 5,262$ ) were distributed  
542 fairly evenly across the entire study area. The highest-value WF supplies were  
543 associated with stream riparian areas in larger, partially-protected sub-basins of  
544 the southwest, and with riparian and wetland complexes in the central- and  
545 north-east. Our results suggest that the highest-value LA supplies were  
546 associated with large areas of upland forests, rivers, lakes, and protected  
547 parkland in the southwest and northeast, with relatively lower cumulative LA  
548 values in the more heavily-populated valley bottom. It is worth noting that, as  
549 our method of delineating distinct LA supply areas was based on the  
550 amalgamation of immediately adjacent raster cells, there were several large LA  
551 supply areas that may or may not be subjectively interpreted by human  
552 consumers as part of a single supply area. Issues with inherent subjectivity  
553 around LA mapping and assessment are common (e.g., van Zanten et al. 2016,

554 see also Daniel et al. 2012), and this could lead to variable results in strength  
555 and physical location of cultural supply areas and their inter- and intra-ES  
556 linkages. Even nuances *within* a single cultural ES valuation method can lead to  
557 complex results; for example, tourist's aesthetic appreciation of landscape  
558 features can differ from that of residents (Beza 2010). That said, the goal of this  
559 study is not to present the most accurate spatial representation of ES and their  
560 connections, but rather is to demonstrate a connectivity-based approach to  
561 evaluating multi-ES relationships. The original LA value distribution map is  
562 reproduced in Fig. 2c (Field et al. 2017).

563

#### 564 *Distribution and values of functional connections between ES supplies*

565 The spatial distribution and value of connections between overlapping ES were  
566 predictable based on the extents of supply area mapping and on the functional  
567 theory we applied to link weighting. Bi-directional overlap links between WF and  
568 LA (n = 9,363 in each direction) were distributed across the entire study area (Fig  
569 5e,h). The highest-value links from LA to WF were associated with stream and  
570 lake riparian areas in both populated and remote valleys in the north, with  
571 riparian and wetland complexes in the central-east, and with remote stream and  
572 river riparian areas in the southwest. Similarly, the highest-value links from WF to  
573 LA were present in stream and river riparian areas in the southwest, and with  
574 stream riparian and wetland complexes in the central-east. For overlapping  
575 connections from PA to LA (n = 174), link distribution was sparse throughout the  
576 valley bottom and limited to croplands with high aesthetic value; primarily  
577 associated with vineyards and orchards (Fig. 5f). In terms of bi-directional  
578 overlap connections, the majority of PA supply areas were connected with WF  
579 regulation areas throughout the valley bottoms (WF to PA n = 1,220; PA to WF n

580 = 1,320), with highly-weighted links typically associated with cultivated lands,  
581 fields, crop transitions, vineyards, and orchards near to (or containing) riparian,  
582 floodplain, and/or wetland areas (Fig. 5g,i).

583

584 Topographic links from high-value WF supplies to other ES supply areas  
585 revealed corridors variable in length and weight flowing across the landscape,  
586 sometimes linking ES supplies ~200 kms apart (Fig. 3). Between pairs of spatially  
587 isolated WF areas, corridors (n = 484,602) approximated the location of  
588 watercourses (FLNRO 2017), as was expected due to the elevation-based LCP  
589 resistance surface used to simulate surface waterflow. The highest-value WF-WF  
590 corridors were observed through the large central Okanagan Lake system and  
591 several of its relatively low-order tributaries; in high-order valley-bottom rivers,  
592 streams and lakes in the southwest; and in the larger valley-bottom rivers of the  
593 northeast. These observations resulted from connections between WF supply  
594 areas and the ILFs that are prevalent next to valley-bottom aquatic areas.

595 Flowing from WF to LA supply areas, corridors were scattered throughout the  
596 study area (n = 2,864), with the majority of links associated with the more  
597 populated valley-bottom areas in the central Okanagan basin (Appendix 3), and  
598 with the highest-value links in higher-order streams where sub-basins contained  
599 larger numbers of WF supply areas upstream of one or several LA supply areas.

600 Connections to PA were only possible where farmlands were present within the  
601 sub-basin of the associated WF supply area, or downstream where farms were  
602 within ILF zones. Therefore, such corridors were concentrated in sub-basins  
603 along the central valley-bottom (n = 5,256), with particularly high weights in a  
604 northern agricultural valley used primarily for growing cereals and vegetables, in  
605 the largest sub-basin in the central Okanagan watershed primarily farmed for

606 berries and tree fruits, and in a southern basin known for vineyards, tree fruits  
607 and vegetables. A general trend we observed for all topographic links was the  
608 co-occurrence of higher-value corridors with larger rivers and streams, rather  
609 than being associated with smaller headwater streams. This was a result of the  
610 culmination of overlapping corridors from several headwater WF areas in the  
611 lower-elevation stream valleys that had the largest number of supply areas for  
612 the related ES pair type.

613

614 When all link types were included on a map of accumulated weights, it  
615 highlighted expansive networks of high-value functional connectivity corridors  
616 between all three ES types and distributed across the entire landscape (Fig. 7).  
617 The highest-value link areas were found in low- and mid-elevation riparian areas  
618 across the landscape; in a mid-elevation wetland complex of the eastern-central  
619 region; in riparian and surface waterflow corridors associated with a large  
620 eastern-central sub-basin; and generally in areas where several (or all) of the  
621 eight link types co-occurred. Notably, the accumulation map revealed that  
622 several of the highest-value areas were not coincident with the highest-value on  
623 any of the individual link-type maps (Fig. 5), and were sometimes in relatively  
624 remote, higher-elevation areas.

625

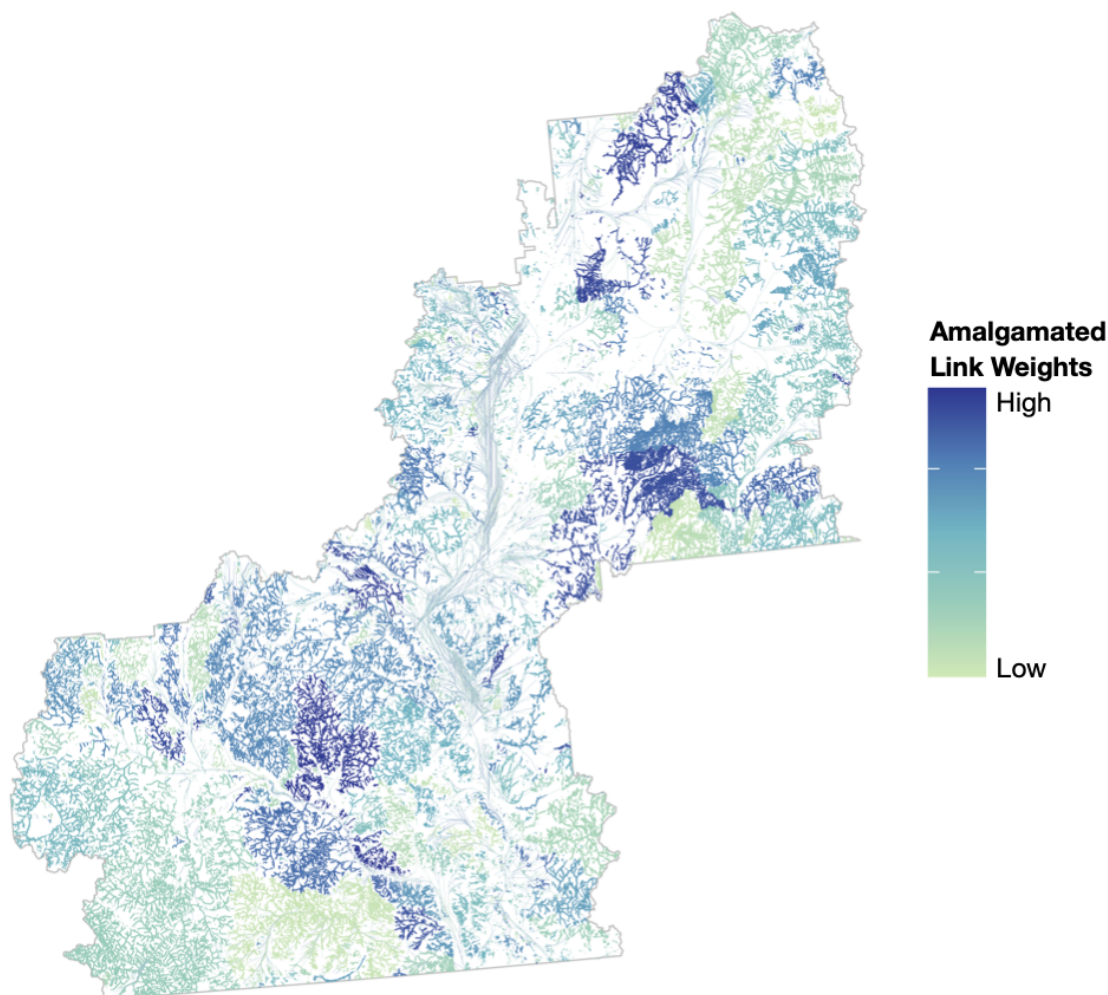

626

627 Figure 7. Distribution and weighting of link values amalgamated across all eight  
628 (8) overlapping and topographic link types across the case study landscape.

629

630 *Spatial coverage of supply area and linkages across LULC types*

631 The distribution of ES supply areas and links were only in part determined by the  
632 underlying LULC types included in the original model parameters. In decreasing  
633 order of coverage of our study area (21,580 km<sup>2</sup>), the high-level LULC types are  
634 as follows: 76.7% forest; 11.9% park (NB: overlaps with forest, grassland, shrub,  
635 rock and exposed categories); 6.8% grassland; 5.8% shrub; 3.7% agriculture;  
636 3.0% waterbodies (lakes, rivers, reservoirs); 1.6% residential; 1.3% rock and

637 exposed land; 0.8% wetland; 0.3% urban; and 0.1% unknown (Appendix 7). For  
638 the subset top-50% ES areas, almost all PA supplies were, unsurprisingly, on  
639 agricultural lands (~100.0%), but only covered 15.8% of all croplands in the  
640 region. Both WF and LA supplies were found mainly on forested lands (78.7%  
641 and 93.0%, respectively) and within parks (14.0% and 13.1%, respectively).  
642 Distribution of top-valued WF supplies covered large portions of most LULC  
643 types in the study area (19.7% to 50.6%; NB: 0% aquatic), including 99.6% of all  
644 mapped wetlands. Top-valued LA supplies spanned the majority of aquatic  
645 (98.8%), forested (81.9%), park (74.4%), and wetland (69.1%) LULC types (Fig.  
646 8a-c).

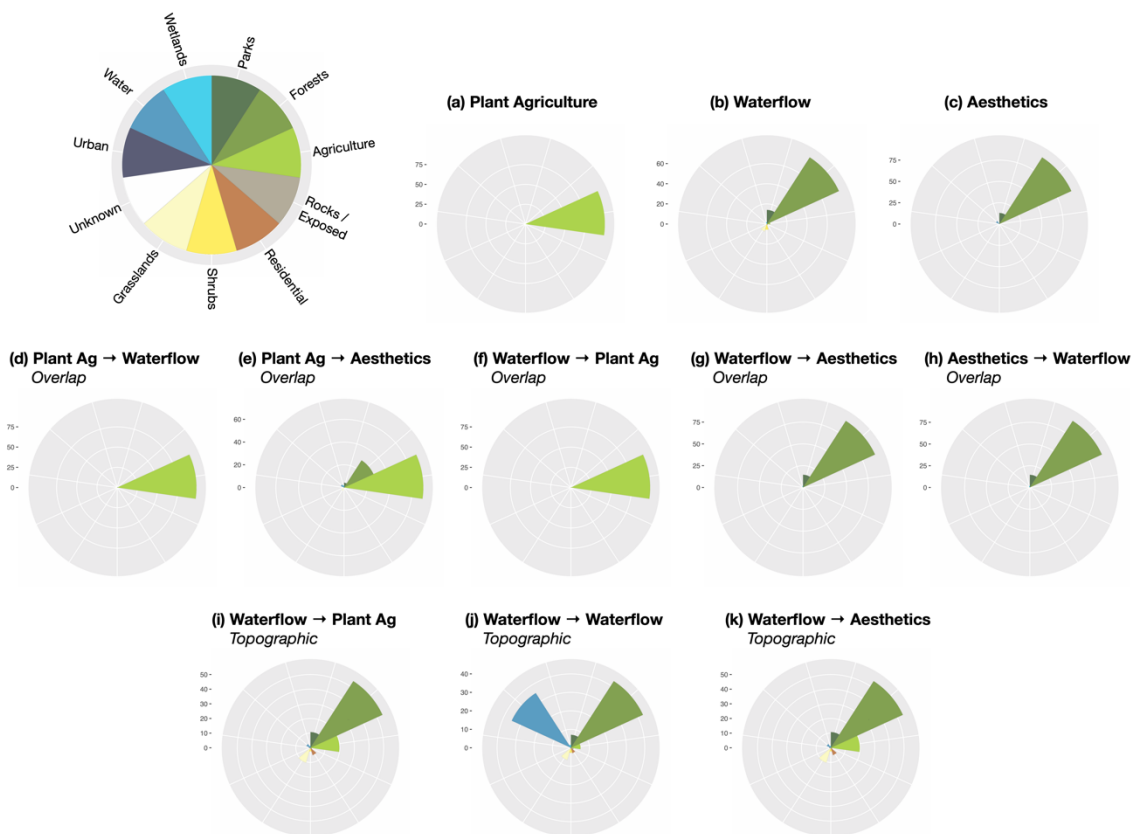

647  
648 Figure 8. Proportion of major LULC types present within the extent of ES supply  
649 and link areas in the case study landscape. LULC types assessed are colour-

650 coded and include forests, agriculture, rocks/exposed areas, residential areas,  
651 shrubs, grasslands, urban areas, water, wetlands, and areas with unknown use  
652 and/or cover. Insets show proportions in coxcombs for each top-value supply  
653 area, including (a) plant food agriculture (PA), (b) waterflow regulation (WF), and  
654 (c) landscape aesthetics (LA); overlapping connections from (d) LA to WF, (e) PA  
655 to LA, (f) PA to WF, (g) WF to LA, and (h) WF to PA; and topographic  
656 connections from (i) WF to WF, (j) WF to PA, and (k) WF to LA.

657

658 Similar trends in LULC coverage were observed for overlapping connections,  
659 with links from PA to LA found mainly on agricultural lands (69.7%) and in forests  
660 (28.5%). In both directions between PA and WF, connections were mainly on  
661 agricultural lands (both 98.0%), and covered 5.8% and 5.7% of all croplands in  
662 our study area from PA to WF and from WF to PA, respectively. In both  
663 directions between WF and LA, connections were mainly on forested land  
664 (90.8% and 91.1%, respectively) and in parks (14.7% and 14.6%, respectively).  
665 Moreover, these links covered large portions of all wetlands, parks and forests  
666 (from WF to LA 68.0%, 39.2 and 37.6%; from WF to LA 68.0%, 39.2 and 37.8%,  
667 respectively) in the study region (Fig. 8d-h).

668

669 For topographic corridors, we found that LULC coverage was less consistent  
670 with relevant ES supply area coverages. Corridors between different WF supply  
671 areas were found mainly in forested (42.9%) and aquatic (35.2%) areas, with  
672 more minor distribution in park (7.1%), grassland (6.9%), and agricultural (5.2%)  
673 LULC types. Notably, topographic WF corridors covered 24.3% of the entire  
674 aquatic areas found in our study region. From WF to PA, corridors mainly  
675 traversed forested areas (54.1%), followed by agricultural (19.8%), park (10.7%),



676 grassland (10.6%), and residential (5.4%) LULC types. From WF to LA, corridors  
677 were mainly found in forested areas (57.3%), followed by parks (14.5%),  
678 agriculture (12.7%), and grasslands (10.2%; Fig. 8i-k). All LULC overlay analyses  
679 results are summarized in Appendix 8.

680

## 681 **Discussion**

682 We applied a novel approach to mapping and modelling the functional  
683 connectivity between multiple types of ES across a regional landscape. By  
684 testing the application of this approach on three ES categories for a case study  
685 area, we identified and mapped eight link types connecting ES supply areas on  
686 the landscape. The results demonstrate the variety of ways categorically  
687 divergent ES can exhibit interdependencies related to their production  
688 potential, and the importance of considering these dependencies in land use  
689 planning for ecological connectivity.

690

691 *The case study: ES connectivity across a heterogeneous regional landscape*

692 The connections we observed between ES revealed high-value multifunctional  
693 linkages on the landscape that were not necessarily predictable from supply  
694 area mapping. Across all link types we found heterogeneous distribution as well  
695 as spatially distinct areas of markedly higher value, or 'hotspots' of connectivity,  
696 relative to surrounding areas (e.g., Alemu et al. 2020). But one surprising  
697 observation is that the weighted amalgamation of all eight link types uncovered  
698 areas of high-value connectivity that were not present on any of the ES supply or  
699 pairwise link maps. This finding points to nuances that can be discovered when  
700 multiple ES *and* multiple linkage types are assessed together, and suggests that  
701 the spatial focus of planning for optimal service provisioning may shift when



702 functional relationships between several ES are considered. Ultimately, such  
703 multifunctional areas represent possible conservation priorities that, if degraded  
704 or lost, may cause significant disruption of ES connectivity networks.  
705 Understanding the complexity of interactions between multiple ES has been  
706 highlighted as a critical challenge in planning for sustainable multifunctional  
707 landscapes in the face of changing environmental conditions and management  
708 interventions (Dee et al. 2017). A recent review of studies that have modelled  
709 interactions between multiple ES found that a large proportion did so from the  
710 perspective of co-occurring production synergies and trade-offs, but that the  
711 examination of flows, and the identification and quantification of explicit  
712 functional relationships remain largely unexplored (Agudelo et al. 2020).  
713 Ultimately, simultaneously modelling multiple ES continues to be difficult in part  
714 because of methodological inadequacies and the complexity of the ecological  
715 processes involved (Kolosz et al. 2018). Our approach provides a new framework  
716 that can help address these challenges.

717

718 From initiation points within WF supply areas, our modelling revealed several  
719 functional connections that operate over both short and long distances. Some of  
720 these topographic corridors extended over 200 km within the boundaries of our  
721 study area and, based on the underlying ecological process theory, also extend  
722 across the Canada-USA border to wetlands, riparian areas, seasonally-flooded  
723 agricultural fields, service supply areas along the extent of the Columbia River to  
724 the Pacific coast confluence between Washington and Oregon states, more than  
725 1,100 km downstream from the originating supply areas in our study region.  
726 Similar long-range connectivity may be observed for other water-related ES  
727 (e.g., water provisioning, water quality), as both mean-annual water volume and

728 water quality have been found to be heavily influenced by first-order headwater  
729 catchments, even in watersheds with large high-order rivers (Alexander et al.  
730 2007, Freeman et al. 2007). Additionally, WF exhibits close- and long-range  
731 interactions with many other ES not modelled in our study. For example, water  
732 extraction and damming to take advantage of freshwater provisioning supplies  
733 alters natural hydrological regimes (e.g., Jackson et al. 2001); afforestation  
734 reduces peak and maintains base flows (e.g., Zhang et al. 2007, Power 2010),  
735 whereas deforestation destabilizes flows (Mäler et al. 2013); areas providing WF  
736 supply help to decrease pollution, flood-related turbidity, and residence time of  
737 chemicals in lakes (Burmil et al. 1999, Blackstock et al. 2001, Jackson et al. 2001,  
738 Bennett et al. 2009); certain pollination services can be facilitated by moving  
739 water (Biesmeijer et al. 2003); and some recreational activities are dependent on  
740 the maintenance of waterflow (e.g., fishing, kayaking; Burmil et al. 1999). Based  
741 on our observations of the potential for both short- and long-range functional  
742 connectivity, ES planning for other water-related services should also consider  
743 the potential impacts of management interventions on related services areas  
744 and management jurisdictions downstream.

745

746 Our study demonstrates that functional connections between ES often span  
747 several LULC categories, and that trends in dominant cover types may be  
748 unexpected relative to those associated with related supply areas. Certain areas  
749 or cover types are sometimes considered ‘hotspots’ for ES production, i.e.,  
750 provide several different, often high-value, ES (e.g., Qiu and Turner 2013). For  
751 example, wetlands provide flood and flow control, storm protection, erosion  
752 control, groundwater supply, water quality maintenance, nutrient waste disposal,  
753 habitat to support fishing and hunting, natural materials, biodiversity, micro-

754 climate stabilization, carbon sequestration, recreation, and aesthetic value  
755 (Brander et al. 2006). Agricultural lands can provide many ES beyond food for  
756 humans, such as habitat and food for pollinators, biological pest control (e.g.,  
757 Loos et al. 2019), and tourism (e.g., Wagner and White 2009). We assessed the  
758 potential for LULC-associated connectivity hotspots in our region using LULC  
759 comparisons. Forested lands clearly stand out as being important for the  
760 regulating and cultural ES we investigated. Forests are often identified as hubs  
761 for maintaining regulating and cultural ES, including surface water quality, soil  
762 retention, carbon storage, and recreation (Matson et al. 1997, Brauman et al.  
763 2007, Qiu and Turner 2013). Notably, although parks make up only 11.9% of the  
764 study area, they represent important landscapes for WF and LA supply and  
765 overlapping connectivity, and as flow corridors between all ES types we  
766 investigated. Both the above observations are likely driven by the suite of  
767 ecological processes present in complex forest, grassland and shrub ecosystems  
768 (e.g., vegetation-mediated infiltration, Mills and Fey 2004), and the contribution  
769 of wildlands and parks to aesthetics (Thompson 1995). From the perspective of  
770 functional connectivity, our study suggests a need to expand upon the ES  
771 'hotspot' notion by considering that other LULC types beyond those associated  
772 with supply areas may be serving as critical corridors for interdependent ES. A  
773 clearly delineated example of this is the ecological process links between  
774 terrestrial and aquatic ecosystems. Areas of land adjacent to waterbodies are  
775 known to provide various regulation services in addition to WF, including  
776 erosion and water quality regulation through soil- and vegetation-mediated  
777 retention and filtration (Mills and Fey 2004). Whereas the model parameters we  
778 applied for WF preclude supply area coverage within any aquatic areas, the  
779 LULC proportions we observed within upland and downslope WF corridors

780 transversed 24.4% of all surface waterbodies in the region and demonstrated  
781 that aquatic areas represent some of the most high-value linkages between  
782 different production areas for this ES. In addition, croplands proportionally  
783 represent the third-largest cover type in the corridors between upland WF and  
784 downslope LA supplies, with the majority of these corridors found in riparian  
785 zones, or on farms adjacent to wetlands and waterbodies. The synergistic  
786 association of WF and PA supply areas has been observed in other ES  
787 interaction studies (e.g., Qiu and Turner 2013), and stems from crops', especially  
788 deep-rooted perennials, ability to provide a variety of hydrological benefits  
789 including increased water infiltration and recharge, reduced runoff, and  
790 mitigation of peak flows (Dabney 1998, Tilman et al. 2002, Brauman et al. 2007,  
791 Power 2010). These observations have implications for ecosystem- and habitat-  
792 based management programs as LULC types are often imposed as boundaries  
793 for interventions and/or institutions (e.g., BC Ministry of Agriculture). Especially  
794 in heterogeneous regional landscapes, our results point to potential for  
795 increased need for cross-jurisdictional collaboration when planning for functional  
796 connectivity in the optimization of multiple ES.

797

798 Ecological degradation and climate change-induced aridity is increasing across  
799 the globe. This has detrimental impacts on the structure and function of dryland  
800 ecosystems, which are characteristics strongly related to the ability of these  
801 systems to produce essential ES (Middleton and Sternberg 2013, Huang et al.  
802 2015). The high interconnectivity of natural biotic and abiotic attributes can lead  
803 to cascading changes. Single ecological attributes can have negative impacts on  
804 several others (Schlesinger et al. 1990, Reynolds et al. 2007, Maestre et al.  
805 2016); can exhibit sudden non-linear responses to increased aridity; and can

806 cross sequential, multi-phase thresholds of ecosystem change. This can further  
807 be complicated by interactions with topographic- and land use-related factors.  
808 Climate forecasts predict that up to 28.6% of current drylands will cross one of  
809 the three sequential aridity-induced degradation thresholds by 2100, broadly  
810 characterized by vegetation decline, soil disruption, and systemic breakdown  
811 (Berdugo et al. 2020). This is relevant to our study region as it comprises the  
812 northern extent of the semi-arid North American Great Basin ecoregion, with  
813 high-elevation mountains flanking its eastern and western boundaries. This  
814 topography leads to the Okanagan region's function as a critical movement  
815 corridor for north-south species migrations (Transboundary Connectivity Group  
816 2016), and it likely exhibits similar pinch-point connectivity dynamics for  
817 topography-influenced ES, as we observed for the WF corridors modelled our  
818 study. The potential for imminent and irreversible degradation of ecological  
819 processes in dryland systems calls attention to the desperate need for  
820 understanding potential implications of these effects on multiple ES and their  
821 interdependencies. Our study is a jumping-off point for a more thorough  
822 evaluation of future aridity risks to ES relationships in the Okanagan and other  
823 dryland regions.

824

825 *The conceptual shift: from correlative interactions to functional connectivity*

826 Designing landscapes for optimizing delivery of ES, while minimizing ecosystem  
827 degradation, requires thorough understanding of the interactions between  
828 multiple services and the ecological processes that drive them (Fu et al. 2013,  
829 Agudelo et al. 2020). Key guiding paradigms for this, and indeed landscape  
830 ecology in general, are to understand the relationships between spatial patterns  
831 and ecological processes, and to consider not only individual components (e.g.,

832 a single ES or supply area) but their combined effects (Wallace 2007, Nassauer  
833 and Opdam 2008, Fu et al. 2013). Viewing ES in terms of their spatial  
834 interconnectivity is especially relevant to regulating and supporting services that  
835 are known to be connected to the supply of many others; e.g., water flow is  
836 essential to the production of water for drinking, irrigation, and industry; plant  
837 and animal food production; regulating microclimates; and, as we exemplify in  
838 this study, landscape aesthetics (Fu et al. 2013).

839

840 Areas of ES supply are not necessarily spatially congruent with the discrete  
841 structural components traditionally considered in landscape connectivity  
842 frameworks (e.g., habitat patches, specific LULC types); therefore, linkages  
843 between ES are also unlikely to be coincident with these components (e.g.,  
844 movement of organisms and matter; Brooks 2003). For example, the global  
845 benefit of carbon storage and sequestration depends only on the quantity of  
846 natural landcover, and not the spatial arrangement of patches (Mitchell et al.  
847 2015). Although protected areas and intact habitat patches are important spaces  
848 for some of the plants, animals, and abiotic ecosystem components responsible  
849 for providing ES, provisioning and flows are not bound by human-defined  
850 reserve areas, and many ES are produced completely by and interact with one-  
851 another in human-modified landscapes (Schröter et al. 2019). Further,  
852 connectivity of certain ES will be limited by distance thresholds and/or human or  
853 ecological barriers to the flow of ecological processes. For example, crop  
854 production can benefit from interspersed natural habitat throughout  
855 agricultural landscapes, which can increase pollination and pest control services  
856 delivery from species that can only move limited distances from their habitat  
857 patches (Tschardt et al. 2005). There may be spatial congruency between

858 existing wildlife movement corridors and certain regulating services, especially  
859 those that depend on the movement of organisms for their delivery, e.g.,  
860 pollinators, disease control, pests and their predators, seed dispersal; Kremen et  
861 al. 2007), which suggests that there may be opportunities for win-win  
862 conservation initiatives for wildlife and ES together. Our approach can be used  
863 to explore this possibility, and to explicitly map and assesses the mechanisms  
864 behind distance-threshold-mediated and cross-landscape ES interactions in  
865 general. Outcomes of such work can be readily incorporated into connectivity-  
866 based management for these and other complex interactions that operate  
867 across heterogeneous landscapes.

868

869 Our approach reveals cross-landscape connectivity processes that represent  
870 important drivers of ES production, and are undetectable with traditional  
871 approaches for identifying ES synergies and trade-offs (e.g., Qui and Turner  
872 2013, Su and Fu 2013, Tomscha and Gergel 2016). It can be used to represent  
873 several different types of functional connections, e.g., between different ES that  
874 occupy the same space, and abiotic movement from one ES supply area to  
875 another across the landscape. Identification of links between spatially co-  
876 occurring supply areas is similar to a representation of paired ES 'interactions', a  
877 concept for identifying synergies and trade-offs among services, as well as  
878 identifying groups of services that repeatedly occur together across a landscape  
879 (i.e., 'ES bundles'; Bennett et al. 2009). Co-occurring ES typically arise as a result  
880 of common drivers or direct interactions among ES. For example, fertilization  
881 can drive-up crop yield while simultaneously decreasing water quality. Such  
882 services can interact through the same underlying ecological function (e.g.,  
883 forests can have high recreational and aesthetic value and also provide water

884 flow regulation). Further, ES in the same ‘neighbourhood ’can interact with one  
885 another (e.g., pollinator habitat adjacent to crop lands can increase crop  
886 productivity; Cord et al. 2019). Our methods take a closer look at the concept of  
887 ES interactions by explicitly representing the mechanisms behind the co-  
888 occurrence ES in the delineation and valuation of these areas (Bennett et al.  
889 2009). Investigation of interaction mechanisms with respect to multi-ES  
890 assessment has been highlighted as a crucial step toward providing more  
891 rigorous information to inform the management of multifunctional landscapes  
892 (Alemu et al. 2020), and our study is one of the few to provide this information  
893 at the regional scale (Agudelo et al. 2020).

894

#### 895 *Practical implications*

896 Landscape planning typically involves considering the spatial layout of different,  
897 often incompatible, land use types that ultimately influence connectivity (Phalan  
898 et al. 2011). From an ecological connectivity perspective, such guidelines may  
899 include the maintenance of biodiversity to support ecosystem function, and  
900 thereby ES production and resilience, by including an assemblage of native  
901 habitat patches, corridors, stepping stones, and sensitive habitat buffers within a  
902 structurally complex matrix, with more focused management strategies for  
903 species and/or functional groups (Fischer et al. 2006). Notwithstanding that  
904 biodiversity can have complex, non-linear relationships with ES production (Fu et  
905 al. 2013) and is not necessarily directly related to multifunctionality (Birkhoffer et  
906 al. 2018), one drawback of this approach is that a disconnect emerges between  
907 the general maintenance of ecological connectivity and the benefits realized by  
908 humans. Recent conceptual frameworks have called for research that uncovers a  
909 more nuanced understanding of how landscape structure impacts the provision



910 of *multiple* ES, how abiotic flows impact ES provision, and which services are  
911 more influenced by landscape connectivity (e.g., Mitchell et al. 2013, Mitchell et  
912 al. 2015). However, by not explicitly considering how ecological processes result  
913 in the production of ES and how these ecological processes are connected (Fu  
914 et al. 2013), there is risk of spatial incongruence between traditional connectivity  
915 planning priority areas and actual ES supply and flows across the landscape. Our  
916 approach helps to address this risk by enabling spatially explicit identification of  
917 high-value multi-ES links across the landscape, which can be overlaid and  
918 compared with other connectivity priorities (e.g., wildlife corridors).

919

#### 920 *Opportunities for future work*

921 Our case study maps and quantifies relationships between ES at a snapshot in  
922 time. However, modifications of natural landcover can change the number, size,  
923 shape, isolation, and distribution of ecological patches across the landscape and  
924 their proximity to human beneficiaries, all of which may lead to positive,  
925 negative or neutral impacts on ES supply and flow (Mitchell et al. 2015). For  
926 example, agricultural intensification tends to negatively impact large pollinators  
927 more than small ones, the former of which are more efficient crop pollinators  
928 (Suding et al. 2008). Both types of pollinators could be represented in a multi-ES  
929 network, and potential impacts of land use change could be addressed using  
930 modelling of future scenarios (e.g., Redhead et al. 2020). In the face of climate  
931 change, increases in dryland aridity causes grasslands and savannahs to  
932 metamorphose into shrublands as the latter grow better in sandy, nutrient-poor  
933 soils (D'Odorico and Okin 2012, Phillips et al. 2019). In our study area  
934 specifically, such a shift would have implications for ES coverage and value  
935 through the dependency of model variables on underlying vegetation

936 characteristics (Field et al. 2017), and thus influence future ES production and  
937 connectivity. The ultimate impacts of landscape changes on ES are dependent  
938 on the structure and quantity of such changes, and on the biophysical process,  
939 ecosystem functions, species, and human activities driving the ES supply of  
940 interest, as well as the flows to and demands of human beneficiaries (Mitchell et  
941 al. 2015). Even if human development does not greatly diminish the quantity of  
942 natural landcover, it can still have far-reaching impacts on ES supply. For  
943 example, the prolific damming of the majority of major river systems has  
944 reduced the flow of water and the use of these systems as corridors for human  
945 movement, and changed natural patterns of water provisioning, water quality  
946 regulation, and recreation opportunities (Loomis 2002, Whittaker and Shelby  
947 2002, Nilsson et al. 2005). Further, it has been shown that spatial correlations  
948 between pairs of ES can exhibit inter-annual variability (e.g., Renard et al. 2015,  
949 Li et al. 2017), and that snapshots in time are not good predictors of how their  
950 relationships may change over time (e.g., Mitchell et al. 2020). Future studies  
951 could use the ES connectivity framework presented here to assess how changes  
952 in LULC ultimately have cascading impacts on multiple ES across a landscape  
953 (Bagstad et al. 2013, Grêt-Regamey et al. 2017, Rieb et al. 2017), which can  
954 practically be achieved by incorporating seasonal and inter-annual variations in  
955 ES supply, demand and functional connectivity (e.g., increases in fresh water  
956 provisioning during dry months; Field and Parrott 2017). The application of our  
957 framework along with scenario modelling and/or historical data could help us to  
958 move beyond examining how natural and anthropogenic drivers of change  
959 impact local provisioning of an individual ES or trade-offs between multiple ES  
960 (e.g., Li et al. 2017, Schroter et al. 2019), to how such isolated drivers might  
961 have far-reaching, cumulative impacts at multiple spatial and temporal scales.

962

963 We acknowledge that several other methods exist for identifying and evaluating  
964 corridors across a landscape, including least cost corridors (Singleton et al.  
965 2002), circuit theory (McRae and Beier 2007, McRae et al. 2008), graph theory  
966 (Fall et al. 2007, Pinto and Keith 2009, Rayfield et al. 2011), networks (Phillips et  
967 al. 2008; Parks et al. 2013), and deterministic eight models (Mark 1984). We  
968 chose to employ only LCP analysis mainly because the topographic ES flows in  
969 our study all originated at WF supply areas, corridors all were to represent the  
970 ecological process of water flowing downslope, and because LCP has been  
971 shown to be a valid method for approximating drainage networks while being  
972 capable of overcoming issues around topographic depressions (Melles et al.  
973 2011). Therefore, a DEM-driven model representing water moving downslope  
974 was deemed the most appropriate for these types of ES connections in our  
975 study region. Further, our aim was to provide relatively simple representations of  
976 corridors between supply areas to support the primary goal of this paper, i.e., to  
977 demonstrate a novel approach for conceptualizing how the provisioning of ES  
978 are functionally connected across a landscape. It is important to highlight that  
979 our method of valuing topographic links corresponds to the accumulated  
980 weights of relevant ecological processes along the entire length of a corridor.  
981 We do not attempt to quantify the potential strength of contribution the  
982 upstream supply area exerts on an individual downstream supply area (i.e.,  
983 contribution to maintaining the downstream area's potential for producing  
984 baseline service supply). A promising area of future research for addressing the  
985 latter distinction will be through the use of network theoretic methods  
986 (discussed below), which can employ patch (e.g., supply area or 'node') and link  
987 valuations, as well as viewing these in the context of the entire network, to

988 calculate metrics of the overall influence of an individual patch (e.g., Field and  
989 Parrott 2017). In summary, future research could compare and validate  
990 alternative spatial corridor mapping and valuing approaches (e.g., Melles et al.  
991 2011) for predicting process-based movement between WF and other ES types.  
992  
993 Landscape connectivity studies have assumed that larger ecological patches are  
994 more robust and valuable to a network (e.g., Pal et al. 2021). However,  
995 especially for multiple ES that span a variety of habitat types, for those  
996 influenced by below-ground processes (e.g., soil texture - WF, Brauman et al.  
997 2007; sub-surface carbon stock - climate regulation, Friess 2016), and for those  
998 dependent on landscape features that are typically independent of 'patch'  
999 arrangement (e.g., topography - WF, Crossman et al. 2013), additional methods  
1000 should be explored to identify alternative methods of delineating and valuing  
1001 patches for ES connectivity. Spatial network (graph) theory has been used to  
1002 assess the movement of individual ES across the landscape (e.g., Janssen et al.  
1003 2006, Fortuna et al. 2006, Heckmann and Schwanghart 2013, Phillips 2013,  
1004 Peron et al. 2014) but, although it has been called for (e.g., Bohan et al. 2013,  
1005 Hines 2015, Quintessence Consortium et al. 2016, Dee et al. 2017), studies on  
1006 real-world networks with different types of linkages between multiple types of  
1007 ES, especially relating to all the broad categories of provisioning, regulating and  
1008 cultural services, are still lacking (Field and Parrott 2017). In spatial network  
1009 analysis, landscape components (e.g., habitat patches) are represented as  
1010 'nodes', and connections (e.g., habitat corridors, species dispersal) form the  
1011 'links' between them. Once built, network metrics can be used to evaluate a  
1012 variety of characteristics including the strength of connectivity, most likely flow  
1013 routes, relative contribution of individual nodes to overall connectivity, flow

1014 efficiency, node and link vulnerability to disturbances, etc. (e.g., Urban et al.,  
1015 2009; Heckmann et al., 2015). Network analyses have been applied to well-  
1016 described species-specific mutualistic interactions as they relate to indicators of  
1017 ES supply (e.g., pollinator and seed-disperser relationships with plants, Gilarranz  
1018 et al. 2011). A recent single ES and species-specific case study on the  
1019 relationship between river red gum tree and periodic flooding (i.e., WF) used a  
1020 conceptual network framework based on the functional drivers and feedbacks  
1021 between abiotic, biotic, and social system components to guide management of  
1022 the system (Dee et al. 2017). However, we know of no study that has considered  
1023 combined biotic and abiotic contributors, both of which are necessary to build  
1024 an accurate picture of ES supply across real world landscapes. Our approach  
1025 provides a framework for network-based ES assessment by spatially representing  
1026 interactions and feedbacks between multiple services from three broad  
1027 categories. It is also amenable to situations where there are several distinct link  
1028 mechanisms (i.e., multiplex network; Horvát and Zweig 2012), resulting in  
1029 positive and negative interactions between the same ES types, all of which can  
1030 be analyzed in a spatial network framework. For example, links between plant  
1031 agriculture and water quality regulation areas could be driven both by positive  
1032 unidirectional flows from (especially perennial) croplands providing water  
1033 filtration services, and by negative unidirectional flows from croplands that use  
1034 fertilizers and/or pesticides. The next step will be to use spatial network analyses  
1035 to assess our multi-ES framework from the perspective of supply area 'nodes'  
1036 and ES connection 'links', which will allow for the incorporation of both  
1037 qualitative and quantitative social-ecological data and the evaluation of metrics  
1038 related to functionality of supply areas, their connections, and the entire ES  
1039 network (e.g., Field and Parrott 2017).

1040

## 1041 **Conclusions**

1042 Our study provides a new approach for the assessment of multiple ES and  
1043 provides important information on the spatial interconnectivity of a variety of  
1044 divergent types of ES across a diverse temperate landscape in southern interior  
1045 British Columbia. We are confident that providing a tool for visualization of  
1046 multiple ES will help address several ongoing challenges: increase awareness  
1047 and understanding of how dependent humans are on nature; highlight a need  
1048 to maintain landscape connectivity to support ecological functioning; advance  
1049 the interdisciplinary science around the ES concept; and help move toward  
1050 incorporating this science into management of natural capital (Guerry et al.  
1051 2015). As the ES concept continues to be developed and refined, considering  
1052 how ES operate within the context of interconnected, complex social-ecological  
1053 systems will help improve our ability to meaningfully incorporate multiple ES  
1054 into decision-making and planning at the landscape scale. Overall, our methods  
1055 not only allow for the explicit incorporation of the current knowledge of the  
1056 ecological processes driving linkages between multiple ES, but they also  
1057 provide decision makers mapping tools that show where these connections  
1058 occur on the landscape and how valuable they are to ES production potential.  
1059 Thus, our approach can help guide planners in predicting how intervention(s) in  
1060 specific location(s) are likely to have synergistic or antagonistic impacts on ES  
1061 supply areas in other, sometimes distant places.

1062

## 1063 **Acknowledgements**

1064 We received constructive feedback from L. Hooker, J. Janmaat and J. Pither.  
1065 Funding for this manuscript was provided by the Regional District of Central

1066 Okanagan, the Okanagan Collaborative Conservation Program, a Discovery  
1067 Grant from the Natural Sciences and Engineering Research Council of Canada  
1068 (NSERC) awarded to L.P., and by a Canada Graduate Scholarship from NSERC  
1069 awarded to R.D.F.

1070

### 1071 **Competing interests**

1072 The authors declare that no competing interests exist.

1073

### 1074 **References**

- 1075 Agudelo C. A. R., S. L. H. Bustos, and C. A. P. Moreno. 2020. Modeling  
1076 interactions among multiple ecosystem services. A critical review. *Ecological*  
1077 *Modelling* **429**:109103. <https://doi.org/10.1016/j.ecolmodel.2020.109103>
- 1078 Alemu J. B., D. R. Richards, L. Y. Gaw, M. Masoudi, Y. Nathan, and D. A. Friess.  
1079 2021. Identifying spatial patterns and interactions among multiple  
1080 ecosystem services in an urban mangrove landscape. *Ecological Indicators*  
1081 **121**:107042. <https://doi.org/10.1016/j.ecolind.2020.107042>
- 1082 Alexander R. B., E. W. Boyer, R. A. Smith, G. E. Schwarz, and R. B. Moore. 2007.  
1083 The role of headwater streams in downstream water quality. *JAWRA Journal*  
1084 *of the American Water Resources Association* **43(1)**:41-59.  
1085 <https://doi.org/10.1111/j.1752-1688.2007.00005.x>
- 1086 Anderson B. J., P. R. Armsworth, F. Eigenbrod, C. D. Thomas, S. Gillings, A.  
1087 Heinemeyer, D. B. Roy, and K. J. Gaston. 2009. Spatial covariance between  
1088 biodiversity and other ecosystem service priorities. *Journal of Applied*  
1089 *Ecology* **46(4)**:888-896. <https://doi.org/10.1111/j.1365-2664.2009.01666.x>
- 1090 Bagstad K. J., D. J. Semmens, S. Waage, and R. Winthrop. 2013. A comparative  
1091 assessment of decision-support tools for ecosystem services quantification  
1092 and valuation. *Ecosystem services* **5**:27-39.  
1093 <https://doi.org/10.1016/j.ecoser.2013.07.004>
- 1094 Bangash R. F., A. Passuello, M. Sanchez-Canales, M. Terrado, A. López, F. J.  
1095 Elorza, G. Ziv, V. Acuña, and M. Schuhmacher. 2013. Ecosystem services in  
1096 Mediterranean river basin: climate change impact on water provisioning and  
1097 erosion control. *Science of the Total Environment* **458**:246-255.  
1098 <https://doi.org/10.1016/j.scitotenv.2013.04.025>

- 1099 Batary P., A. Baldi, M. Sarospataki, F. Kohler, J. Verhulst, E. Knop, F. Herzog,  
1100 and D. Kleijn. 2010. Effect of conservation management on bees and insect-  
1101 pollinated grassland plant communities in three European countries.  
1102 *Agriculture, Ecosystems & Environment* **136(1)**:35-39.  
1103 <https://doi.org/10.1016/j.agee.2009.11.004>
- 1104 Beier P., D. R. Majka, and S. L. Newell. 2009. Uncertainty analysis of least-cost  
1105 modeling for designing wildlife linkages. *Ecological Applications* **19(8)**:2067-  
1106 2077. <https://doi.org/10.1890/08-1898.1>
- 1107 Bennett E. M., G. D. Peterson, and L. J. Gordon. 2009. Understanding  
1108 relationships among multiple ecosystem services. *Ecology Letters*  
1109 **12(12)**:1394-1404. <https://doi.org/10.1111/j.1461-0248.2009.01387.x>
- 1110 Bennett E. M., J. Baird, H. Baulch, R. Chaplin-Kramer, E. Fraser, P. Loring, P.  
1111 Morrison, L. Parrott, K. Sherren, and K. J. Winkler. 2021. Ecosystem services  
1112 and the resilience of agricultural landscapes. Pages 1-43 *In Advances in*  
1113 *Ecological Research*, Elsevier. <https://doi.org/10.1016/bs.aecr.2021.01.001>
- 1114 Berdugo M., M. Delgado-Baquerizo, S. Soliveres, R. Hernández-Clemente, Y.  
1115 Zhao, J. J. Gaitán, N. Gross, H. Saiz, V. Maire, and A. Lehman. 2020. Global  
1116 ecosystem thresholds driven by aridity. *Science* **367(6479)**:787-790.  
1117 <https://doi.org/10.1126/science.aay5958>
- 1118 Beza B. B. 2010. The aesthetic value of a mountain landscape: A study of the Mt.  
1119 Everest Trek. *Landscape and Urban Planning* **97(4)**:306-317.  
1120 <https://doi.org/10.1016/j.landurbplan.2010.07.003>
- 1121 Bialonski S., M. Horstmann, and K. Lehnertz. 2010. From brain to earth and  
1122 climate systems: Small-world interaction networks or not? *Chaos: An*  
1123 *Interdisciplinary Journal of Nonlinear Science* **20(1)**:013134.  
1124 <https://doi.org/10.1063/1.3360561>
- 1125 Biesmeijer J. C., S. P. Roberts, M. Reemer, R. Ohlemuller, M. Edwards, T.  
1126 Peeters, A. P. Schaffers, S. G. Potts, R. Kleukers, C. D. Thomas, J. Settele,  
1127 and W. E. Kunin. 2006. Parallel declines in pollinators and insect-pollinated  
1128 plants in Britain and the Netherlands. *Science* **313(5785)**:351-354.  
1129 <https://doi.org/10.1126/science.1127863>
- 1130 Biggs R., M. Schlüter, D. Biggs, E. L. Bohensky, S. BurnSilver, G. Cundill, V.  
1131 Dakos, T. M. Daw, L. S. Evans, and K. Kotschy. 2012. Toward principles for  
1132 enhancing the resilience of ecosystem services. *Annual Review of*  
1133 *Environment and Resources* **37**:421-448. <https://doi.org/10.1146/annurev-environ-051211-123836>  
1134



- 1135 Birkhofer K., G. K. Andersson, J. Bengtsson, R. Bommarco, J. Dänhardt, B.  
1136 Ekbohm, J. Ekroos, T. Hahn, K. Hedlund, and A. M. Jönsson. 2018.  
1137 Relationships between multiple biodiversity components and ecosystem  
1138 services along a landscape complexity gradient. *Biological Conservation*  
1139 **218**:247-253. <https://doi.org/10.1016/j.biocon.2017.12.027>
- 1140 Bivand R., C. Rundel, E. Pebesma, R. Stuetz, K. O. Hufthammer, and M. R.  
1141 Bivand. 2017. Package 'rgeos'. *The Comprehensive R Archive Network*  
1142 (CRAN). <https://r-forge.r-project.org/projects/rgeos/>
- 1143 Bivand R., T. Keitt, B. Rowlingson, E. Pebesma, M. Sumner, R. Hijmans, E.  
1144 Rouault, and M. R. Bivand. 2015. Package 'rgdal'. *Bindings for the*  
1145 *Geospatial Data Abstraction Library*. [https://cran.r-](https://cran.r-project.org/web/packages/rgdal/index.html)  
1146 [project.org/web/packages/rgdal/index.html](https://cran.r-project.org/web/packages/rgdal/index.html)
- 1147 Bivand R. S., E. J. Pebesma, V. Gomez-Rubio, and E. J. Pebesma. 2013. Applied  
1148 spatial data analysis with R, Volume 2. Springer, New York.  
1149 <https://doi.org/10.1007/978-1-4614-7618-4>
- 1150 Blackstock M. 2001. Water: A First Nations' Spiritual and Ecological Perspective.  
1151 *BC Journal of Ecosystems and Management* **1(1)**:1-14.
- 1152 Boesing A. L., P. R. Prist, J. Barreto, C. Hohlenwerger, M. Maron, J. R. Rhodes,  
1153 E. Romanini, L. R. Tambosi, M. Vidal, and J. P. Metzger. 2020. Ecosystem  
1154 services at risk: integrating spatiotemporal dynamics of supply and demand  
1155 to promote long-term provision. *One Earth* **3(6)**:704-713.  
1156 <https://doi.org/10.1016/j.oneear.2020.11.003>
- 1157 Bohan D. A., A. Raybould, C. Mulder, G. Woodward, A. Tamaddon-Nezhad, N.  
1158 Bluthgen, M. J. Pocock, S. Muggleton, D. M. Evans, and J. Astegiano. 2013.  
1159 Networking agroecology: integrating the diversity of agroecosystem  
1160 interactions. *Advances in Ecological Research* **49**:1-67.  
1161 <https://doi.org/10.1016/B978-0-12-420002-9.00001-9>
- 1162 Boyd J., S. Banzhaf. 2007. What are ecosystem services? The need for  
1163 standardized environmental accounting units. *Ecological Economics*  
1164 **63(2)**:616-626. <https://doi.org/10.1016/j.ecolecon.2007.01.002>
- 1165 Brander L. M., R. J. Florax, and J. E. Vermaat. 2006. The empirics of wetland  
1166 valuation: a comprehensive summary and a meta-analysis of the literature.  
1167 *Environmental and Resource Economics* **33(2)**:223-250.  
1168 <https://doi.org/10.1007/s10640-005-3104-4>
- 1169 Brauman K. A., G. C. Daily, T. K. Duarte, and H. A. Mooney. 2007. The nature  
1170 and value of ecosystem services: an overview highlighting hydrologic

- 1171 services. *Annu.Rev.EnvIRON.Resour.* **32**:67-98.  
1172 <https://doi.org/10.1146/annurev.energy.32.031306.102758>
- 1173 Brooks C. 2003. A scalar analysis of landscape connectivity. *Oikos* :433-439.
- 1174 Burmil S., T. C. Daniel, and J. D. Hetherington. 1999. Human values and  
1175 perceptions of water in arid landscapes. *Landscape and Urban Planning*  
1176 **44(2)**:99-109. [https://doi.org/10.1016/S0169-2046\(99\)00007-9](https://doi.org/10.1016/S0169-2046(99)00007-9)
- 1177 Butchart S. H., M. Walpole, B. Collen, A. van Strien, J. P. Scharlemann, R. E.  
1178 Almond, J. E. Baillie, B. Bomhard, C. Brown, J. Bruno, K. E. Carpenter, G.  
1179 M. Carr, J. Chanson, A. M. Chenery, J. Csirke, N. C. Davidson, F. Dentener,  
1180 M. Foster, A. Galli, J. N. Galloway, P. Genovesi, R. D. Gregory, M. Hockings,  
1181 V. Kapos, J. F. Lamarque, F. Leverington, J. Loh, M. A. McGeoch, L. McRae,  
1182 A. Minasyan, M. Hernandez Morcillo, T. E. Oldfield, D. Pauly, S. Quader, C.  
1183 Revenga, J. R. Sauer, B. Skolnik, D. Spear, D. Stanwell-Smith, S. N. Stuart, A.  
1184 Symes, M. Tierney, T. D. Tyrrell, J. C. Vie, and R. Watson. 2010. Global  
1185 biodiversity: indicators of recent declines. *Science* **328(5982)**:1164-1168.  
1186 <https://doi.org/10.1126/science.1187512>
- 1187 Cadotte M. W., K. Carscadden, and N. Mirotchnick. 2011. Beyond species:  
1188 functional diversity and the maintenance of ecological processes and  
1189 services. *Journal of Applied Ecology* **48(5)**:1079-1087.  
1190 <https://doi.org/10.1111/j.1365-2664.2011.02048.x>
- 1191 Carpenter S. R., E. G. Booth, S. Gillon, C. J. Kucharik, S. Loheide, A. S. Mase, M.  
1192 Motew, J. Qiu, A. R. Rissman, and J. Seifert. 2015. Plausible futures of a  
1193 social-ecological system: Yahara watershed, Wisconsin, USA. *Ecology and*  
1194 *Society* **20(2)**:10. <http://dx.doi.org/10.5751/ES-07433-200210>
- 1195 Carpenter S. R., H. A. Mooney, J. Agard, D. Capistrano, R. S. Defries, S. Diaz, T.  
1196 Dietz, A. K. Duraiappah, A. Oteng-Yeboah, H. M. Pereira, C. Perrings, W. V.  
1197 Reid, J. Sarukhan, R. J. Scholes, and A. Whyte. 2009. Science for managing  
1198 ecosystem services: Beyond the Millennium Ecosystem Assessment.  
1199 *Proceedings of the National Academy of Sciences of the United States of*  
1200 *America* **106(5)**:1305-1312. <https://doi.org/10.1073/pnas.0808772106>
- 1201 Caslys Consulting Ltd. A biodiversity conservation analysis summary for the  
1202 Okanagan region. 2013. Okanagan Collaborative Conservation Program  
1203 and South Okanagan Similkameen Conservation Program, Kelowna, British  
1204 Columbia.
- 1205 Chi Y., H. Shi, W. Zheng, J. Sun, and Z. Fu. 2018. Spatiotemporal characteristics  
1206 and ecological effects of the human interference index of the Yellow River

- 1207 Delta in the last 30 years. *Ecological Indicators* **89**:880-892.  
1208 <https://doi.org/10.1016/j.ecolind.2017.12.025>
- 1209 Cord A. F., N. Schwarz, R. Seppelt, M. Volk, and M. Schröter. 2019. Introduction  
1210 to Part III: Trade-Offs and Synergies Among Ecosystem Services. Pages 245-  
1211 249 In M. Schröter, A. Bonn, S. Klotz, R. Seppelt, C. Baessler, editors. Atlas  
1212 of Ecosystem Services, Springer, Cham. [https://doi.org/10.1007/978-3-319-96229-0\\_38](https://doi.org/10.1007/978-3-319-96229-0_38)
- 1214 Cressie N. 1993. Statistics for spatial data. John Wiley & Sons, Inc., New York.
- 1215 Crossman N. D., B. Burkhard, S. Nedkov, L. Willemsen, K. Petz, I. Palomo, E. G.  
1216 Drakou, B. Martín-Lopez, T. McPhearson, and K. Boyanova. 2013. A  
1217 blueprint for mapping and modelling ecosystem services. *Ecosystem*  
1218 *Services* **4**:4-14. <https://doi.org/10.1016/j.ecoser.2013.02.001>
- 1219 Cui B., Z. Zhang, and X. Lei. 2012. Implementation of diversified ecological  
1220 networks to strengthen wetland conservation. *Clean–Soil, Air, Water*  
1221 **40(10)**:1015-1026. <https://doi.org/10.1002/clen.201200026>
- 1222 Cumming G. S., D. H. Cumming, and C. L. Redman. 2006. Scale mismatches in  
1223 social-ecological systems: causes, consequences, and solutions. *Ecology*  
1224 *and society* **11(1)**.
- 1225 Dabney S. M. 1998. Cover crop impacts on watershed hydrology. *Journal of Soil*  
1226 *and Water Conservation* **53(3)**:207-213.
- 1227 Daily G. C., S. Polasky, J. Goldstein, P. M. Kareiva, H. A. Mooney, L. Pejchar, T.  
1228 H. Ricketts, J. Salzman, and R. Shallenberger. 2009. Ecosystem services in  
1229 decision making: time to deliver. *Frontiers in Ecology and the Environment*  
1230 **7(1)**:21-28. <https://doi.org/10.1890/080025>
- 1231 Dalgaard T., N. J. Hutchings, and J. R. Porter. 2003. Agroecology, scaling and  
1232 interdisciplinarity. *Agriculture, Ecosystems & Environment* **100(1)**:39-51.  
1233 [https://doi.org/10.1016/S0167-8809\(03\)00152-X](https://doi.org/10.1016/S0167-8809(03)00152-X)
- 1234 Daniel T. C., A. Muhar, A. Arnberger, O. Aznar, J. W. Boyd, K. M. Chan, R.  
1235 Costanza, T. Elmqvist, C. G. Flint, P. H. Gobster, A. Gret-Regamey, R. Lave,  
1236 S. Muhar, M. Penker, R. G. Ribe, T. Schauppenlehner, T. Sikor, I. Soloviy, M.  
1237 Spierenburg, K. Taczanowska, J. Tam, and A. von der Dunk. 2012.  
1238 Contributions of cultural services to the ecosystem services agenda.  
1239 *Proceedings of the National Academy of Sciences of the United States of*  
1240 *America* **109(23)**:8812-8819. <https://doi.org/10.1073/pnas.1114773109>
- 1241 De Groot R. S., R. Alkemade, L. Braat, L. Hein, and L. Willemsen. 2010.  
1242 Challenges in integrating the concept of ecosystem services and values in

- 1243 landscape planning, management and decision making. *Ecological*  
1244 *complexity* **7(3)**:260-272. <https://doi.org/10.1016/j.ecocom.2009.10.006>
- 1245 De Loë R., R. Kreutzwiser, and L. Moraru. 2001. Adaptation options for the near  
1246 term: climate change and the Canadian water sector. *Global Environmental*  
1247 *Change* **11(3)**:231-245. [https://doi.org/10.1016/S0959-3780\(00\)00053-4](https://doi.org/10.1016/S0959-3780(00)00053-4)
- 1248 Debinski D. M., R. D. Holt. 2000. A survey and overview of habitat fragmentation  
1249 experiments. *Conservation Biology* **14(2)**:342-355.  
1250 <https://doi.org/10.1046/j.1523-1739.2000.98081.x>
- 1251 Dee L. E., S. Allesina, A. Bonn, A. Eklöf, S. D. Gaines, J. Hines, U. Jacob, E.  
1252 McDonald-Madden, H. Possingham, and M. Schröter. 2017.  
1253 Operationalizing network theory for ecosystem service assessments. *Trends*  
1254 *in ecology & evolution* **32(2)**:118-130.  
1255 <https://doi.org/10.1016/j.tree.2016.10.011>
- 1256 DeLaney T. A. 1995. Benefits to downstream flood attenuation and water quality  
1257 as a result of constructed wetlands in agricultural landscapes. *Journal of Soil*  
1258 *and Water Conservation* **50(6)**:620-626.
- 1259 Dobbs C., D. Kendal, and C.R. Nitschke. 2014. Multiple ecosystem services and  
1260 disservices of the urban forest establishing their connections with landscape  
1261 structure and sociodemographics. *Ecological Indicators*. **43**:44-55.  
1262 <https://doi.org/10.1016/j.ecolind.2014.02.007>
- 1263 Dodds W. K., R. M. Oakes. 2008. Headwater influences on downstream water  
1264 quality. *Environmental Management* **41(3)**:367-377.  
1265 <https://doi.org/10.1007/s00267-007-9033-y>
- 1266 D'Odorico P., G. S. Okin, and B. T. Bestelmeyer. 2012. A synthetic review of  
1267 feedbacks and drivers of shrub encroachment in arid grasslands.  
1268 *Ecohydrology* **5(5)**:520-530. <https://doi.org/10.1002/eco.259>
- 1269 Dutta S., M. Sahana, and S. K. Guchhait. 2017. Assessing anthropogenic  
1270 disturbance on forest health based on fragment grading in Durgapur Forest  
1271 Range, West Bengal, India. *Spatial Information Research* **25(3)**:501-512.  
1272 <https://doi.org/10.1007/s41324-017-0117-3>
- 1273 Egoh B., B. Reyers, M. Rouget, D. M. Richardson, D. C. Le Maitre, and A. S. van  
1274 Jaarsveld. 2008. Mapping ecosystem services for planning and  
1275 management. *Agriculture, Ecosystems & Environment* **127(1)**:135-140.  
1276 <https://doi.org/10.1016/j.agee.2008.03.013>
- 1277 Ekroos J., O. Olsson, M. Rundlöf, F. Wätzold, and H. G. Smith. 2014. Optimizing  
1278 agri-environment schemes for biodiversity, ecosystem services or both?

- 1279 *Biological Conservation* **172**:65-71.  
1280 <https://doi.org/10.1016/j.biocon.2014.02.013>
- 1281 Ernstson H., S. Barthel, E. Andersson, and S. T. Borgström. 2010. Scale-crossing  
1282 brokers and network governance of urban ecosystem services: the case of  
1283 Stockholm. *Ecology and Society* **15(4)**:28.
- 1284 ESRI. 2011. ArcGIS Desktop. Redlands, CA: Environmental Systems Research  
1285 Institute. **Release 10**.
- 1286 Fahrig L. 2003. Effects of habitat fragmentation on biodiversity. *Annual Review*  
1287 *of Ecology, Evolution, and Systematics* **34**:487-515.  
1288 <https://doi.org/10.1146/annurev.ecolsys.34.011802.132419>
- 1289 Fall A., M. Fortin, M. Manseau, and D. O'Brien. 2007. Spatial graphs: principles  
1290 and applications for habitat connectivity. *Ecosystems* **10(3)**:448-461.  
1291 <https://doi.org/10.1007/s10021-007-9038-7>
- 1292 Field R. D. 2021. Mapping the functional connectivity of ecosystem services  
1293 supply across a regional landscape - Data and scripts. *Open Science*  
1294 *Framework* <https://doi.org/10.17605/OSF.IO/9S4RM>
- 1295 Field R, Kyle C, Pedersen S, Parrott L. Ecosystem Services Mapping to Support  
1296 Environmental Conservation Planning Decisions in the Okanagan Region:  
1297 Year 1 Progress Report. Kelowna, BC: Prepared by: Okanagan Institute for  
1298 Biodiversity, Resilience and Ecosystem Services (BRASES), Prepared for:  
1299 Environment and Climate Change Canada.; 2017. Report nr GCXE17P178.  
1300 39 p.
- 1301 Field R. D., L. Parrott. 2017. Multi-ecosystem services networks: A new  
1302 perspective for assessing landscape connectivity and resilience. *Ecological*  
1303 *Complexity* **32**:31-41. <https://doi.org/10.1016/j.ecocom.2017.08.004>
- 1304 Fischer J., D. B. Lindenmayer, and A. D. Manning. 2006. Biodiversity, ecosystem  
1305 function, and resilience: ten guiding principles for commodity production  
1306 landscapes. *Frontiers in Ecology and the Environment* **4(2)**:80-86.  
1307 [https://doi.org/10.1890/1540-9295\(2006\)004\[0080:BEFART\]2.0.CO;2](https://doi.org/10.1890/1540-9295(2006)004[0080:BEFART]2.0.CO;2)
- 1308 Fleischner T. L. 1994. Ecological costs of livestock grazing in western North  
1309 America. *Conservation Biology* **8(3)**:629-644.  
1310 <https://doi.org/10.1046/j.1523-1739.1994.08030629.x>
- 1311 FLNRO (BC Ministry of Forests, Lands and Natural Resource Operations). 2017.  
1312 Freshwater Atlas. BC Data Catalogue. <https://data.gov.bc.ca/>
- 1313 Foley J. A., N. Ramankutty, K. A. Brauman, E. S. Cassidy, J. S. Gerber, M.  
1314 Johnston, N. D. Mueller, C. O'Connell, D. K. Ray, and P. C. West. 2011.

- 1315 Solutions for a cultivated planet. *Nature* **478(7369)**:337-342.  
1316 <https://doi.org/10.1038/nature10452>
- 1317 Foley J. A., R. Defries, G. P. Asner, C. Barford, G. Bonan, S. R. Carpenter, F. S.  
1318 Chapin, M. T. Coe, G. C. Daily, H. K. Gibbs, J. H. Helkowski, T. Holloway, E.  
1319 A. Howard, C. J. Kucharik, C. Monfreda, J. A. Patz, I. C. Prentice, N.  
1320 Ramankutty, and P. K. Snyder. 2005. Global consequences of land use.  
1321 *Science* **309(5734)**:570-574. <https://doi.org/10.1126/science.1111772>
- 1322 Fortuna M. A., C. Gomez-Rodriguez, and J. Bascompte. 2006. Spatial network  
1323 structure and amphibian persistence in stochastic environments.  
1324 *Proceedings of the Royal Society B: Biological Sciences* **273(1592)**:1429-  
1325 1434. <https://doi.org/10.1098/rspb.2005.3448>
- 1326 Freeman M. C., C. M. Pringle, and C. R. Jackson. 2007. Hydrologic connectivity  
1327 and the contribution of stream headwaters to ecological integrity at regional  
1328 scales. *JAWRA Journal of the American Water Resources Association*  
1329 **43(1)**:5-14. <https://doi.org/10.1111/j.1752-1688.2007.00002.x>
- 1330 Friess D. A. 2016. Ecosystem services and disservices of mangrove forests:  
1331 insights from historical colonial observations. *Forests* **7(9)**:183.  
1332 <https://doi.org/10.3390/f7090183>
- 1333 Fu B., S. Wang, C. Su, and M. Forsius. 2013. Linking ecosystem processes and  
1334 ecosystem services. *Current Opinion in Environmental Sustainability* **5(1)**:4-  
1335 10. <https://doi.org/10.1016/j.cosust.2012.12.002>
- 1336 Fu B., J. Wang, L. Chen, and Y. Qiu. 2003. The effects of land use on soil  
1337 moisture variation in the Danangou catchment of the Loess Plateau, China.  
1338 *Catena* **54(1-2)**:197-213. [https://doi.org/10.1016/S0341-8162\(03\)00065-1](https://doi.org/10.1016/S0341-8162(03)00065-1)
- 1339 Fu B., Y. Wang, Y. Lu, C. He, L. Chen, and C. Song. 2009. The effects of land-  
1340 use combinations on soil erosion: a case study in the Loess Plateau of China.  
1341 *Progress in Physical Geography* **33(6)**:793-804.  
1342 <https://doi.org/10.1177/0309133309350264>
- 1343 Gardner R. H. 1999. RULE: map generation and a spatial analysis program.  
1344 Pages 280-303 In J. M. Klopatek and R. H. Gardner, editors. *Landscape*  
1345 *Ecological Analysis*, Springer-Verlag, New York.
- 1346 Gilarranz L. J., J. M. Pastor, and J. Galeano. 2012. The architecture of weighted  
1347 mutualistic networks. *Oikos* **121(7)**:1154-1162.  
1348 <https://doi.org/10.1111/j.1600-0706.2011.19592.x>
- 1349 Gonzalez A., N. Mouquet, and M. Loreau. 2009. Biodiversity as spatial  
1350 insurance: the effects of habitat fragmentation and dispersal on ecosystem



- 1351 functioning. Pages 134-146 *In* S. Naeem, D.E. Bunker, A. Hector, M. Loreau,  
1352 C. Perrings, editors. Biodiversity, ecosystem functioning and ecosystem  
1353 services, Oxford University Press, New York.
- 1354 Grêt-Regamey A., E. Sirén, S. H. Brunner, and B. Weibel. 2017. Review of  
1355 decision support tools to operationalize the ecosystem services concept.  
1356 *Ecosystem Services* **26**:306-315.  
1357 <https://doi.org/10.1016/j.ecoser.2016.10.012>
- 1358 Guerry A. D., S. Polasky, J. Lubchenco, R. Chaplin-Kramer, G. C. Daily, R. Griffin,  
1359 M. Ruckelshaus, I. J. Bateman, A. Duraiappah, T. Elmqvist, M. W. Feldman,  
1360 C. Folke, J. Hoekstra, P. M. Kareiva, B. L. Keeler, S. Li, E. McKenzie, Z.  
1361 Ouyang, B. Reyers, T. H. Ricketts, J. Rockstrom, H. Tallis, and B. Vira. 2015.  
1362 Natural capital and ecosystem services informing decisions: From promise  
1363 to practice. *Proceedings of the National Academy of Sciences of the United*  
1364 *States of America* **112(24)**:7348-7355.  
1365 <https://doi.org/10.1073/pnas.1503751112>
- 1366 Haase D., N. Schwarz, M. Strohbach, F. Kroll, and R. Seppelt. 2012. Synergies,  
1367 trade-offs, and losses of ecosystem services in urban regions: an integrated  
1368 multiscale framework applied to the Leipzig-Halle Region, Germany.  
1369 *Ecology and Society* **17(3)**:22.
- 1370 Heckmann T., W. Schwanghart. 2013. Geomorphic coupling and sediment  
1371 connectivity in an alpine catchment—Exploring sediment cascades using  
1372 graph theory. *Geomorphology* **182**:89-103.  
1373 <https://doi.org/10.1016/j.geomorph.2012.10.033>
- 1374 Heckmann T., W. Schwanghart, and J. D. Phillips. 2015. Graph theory—Recent  
1375 developments of its application in geomorphology. *Geomorphology*  
1376 **243**:130-146. <https://doi.org/10.1016/j.geomorph.2014.12.024>
- 1377 Hijmans R. J., J. van Etten. 2012. raster: Geographic analysis and modeling with  
1378 raster data. R package version 2.0-12. [http://CRAN.R-project.org/](http://CRAN.R-project.org/package=raster)  
1379 [package=raster](http://CRAN.R-project.org/package=raster).
- 1380 Hines J., van der Putten, Wim H, G. B. De Deyn, C. Wagg, W. Voigt, C. Mulder,  
1381 W. W. Weisser, J. Engel, C. Melian, and S. Scheu. 2015. Towards an  
1382 integration of biodiversity–ecosystem functioning and food web theory to  
1383 evaluate relationships between multiple ecosystem services. *Advances in*  
1384 *Ecological Research* **53**:161-199.  
1385 <https://doi.org/10.1016/bs.aecr.2015.09.001>
- 1386 Horvát, E-A, K.A. Zweig 2012. One-mode projections of multiplex bipartite  
1387 graphs. Pages 599-606 *In* Proceedings of the 2012 International Conference

- 1388 on Advances in Social Networks Analysis and Mining (ASONAM 2012),  
1389 August 26-29, IEEE Computer Society, Washington, DC.  
1390 <https://doi.org/10.1109/ASONAM.2012.101>
- 1391 Houlihan J. E., C. S. Findlay. 2004. Estimating the 'critical' distance at which  
1392 adjacent land-use degrades wetland water and sediment quality. *Landscape*  
1393 *Ecology* **19(6)**:677-690.  
1394 <https://doi.org/10.1023/B:LAND.0000042912.87067.35>
- 1395 Ingram J., P. Gregory, and A. Izac. 2008. The role of agronomic research in  
1396 climate change and food security policy. *Agriculture, Ecosystems &*  
1397 *Environment* **126(1-2)**:4-12. <https://doi.org/10.1016/j.agee.2008.01.009>
- 1398 Jackson R. B., S. R. Carpenter, C. N. Dahm, D. M. McKnight, R. J. Naiman, S. L.  
1399 Postel, and S. W. Running. 2001. Water in a changing world. *Ecological*  
1400 *Applications* **11(4)**:1027-1045. [https://doi.org/10.1890/1051-](https://doi.org/10.1890/1051-0761(2001)011[1027:WIACW]2.0.CO;2)  
1401 [0761\(2001\)011\[1027:WIACW\]2.0.CO;2](https://doi.org/10.1890/1051-0761(2001)011[1027:WIACW]2.0.CO;2)
- 1402 Janssen M. A., Ö. Bodin, J. M. Anderies, T. Elmqvist, H. Ernstson, R. R.  
1403 McAllister, P. Olsson, and P. Ryan. 2006. Toward a network perspective of  
1404 the study of resilience in social-ecological systems. *Ecology and Society*  
1405 **11(1)**:15. <http://www.jstor.org/stable/26267803>
- 1406 Kerr J. T., J. Cihlar. 2004. Patterns and causes of species endangerment in  
1407 Canada. *Ecological Applications* **14(3)**:743-753. [https://doi.org/10.1890/02-](https://doi.org/10.1890/02-5117)  
1408 [5117](https://doi.org/10.1890/02-5117)
- 1409 Kolosz B., I. Athanasiadis, G. Cadisch, T. Dawson, C. Giupponi, M. Honzák, J.  
1410 Martinez-Lopez, A. Marvuglia, V. Mojtahed, and K. B. Ogutu. 2018.  
1411 Conceptual advancement of socio-ecological modelling of ecosystem  
1412 services for re-evaluating Brownfield land. *Ecosystem Services* **33**:29-39.  
1413 <https://doi.org/10.1016/j.ecoser.2018.08.003>
- 1414 Kort J. 1988. 9. Benefits of windbreaks to field and forage crops. *Agriculture,*  
1415 *Ecosystems & Environment* **22**:165-190. [https://doi.org/10.1016/0167-](https://doi.org/10.1016/0167-8809(88)90017-5)  
1416 [8809\(88\)90017-5](https://doi.org/10.1016/0167-8809(88)90017-5)
- 1417 Kraus E. 2014. Gloria Pungetti, Gonzalo Oviedo, and Della Hooke (eds.), Sacred  
1418 species and sites: advances in biocultural conservation. *Landscape Ecology*  
1419 **29(8)**:1461-1462. <https://doi.org/10.1007/s10980-014-0072-5>
- 1420 Kremen C., R. S. Ostfeld. 2005. A call to ecologists: measuring, analyzing, and  
1421 managing ecosystem services. *Frontiers in Ecology and the Environment*  
1422 **3(10)**:540-548. [https://doi.org/10.1890/1540-](https://doi.org/10.1890/1540-9295(2005)003[0540:ACTEMA]2.0.CO;2)  
1423 [9295\(2005\)003\[0540:ACTEMA\]2.0.CO;2](https://doi.org/10.1890/1540-9295(2005)003[0540:ACTEMA]2.0.CO;2)



- 1424 Kremen C., N. M. Williams, M. A. Aizen, B. Gemmill-Herren, G. LeBuhn, R.  
1425 Minckley, L. Packer, S. G. Potts, T. Roulston, and I. Steffan-Dewenter. 2007.  
1426 Pollination and other ecosystem services produced by mobile organisms: a  
1427 conceptual framework for the effects of land-use change. *Ecology Letters*  
1428 **10(4)**:299-314. <https://doi.org/10.1111/j.1461-0248.2007.01018.x>
- 1429 Kyle C. 2018. Chinese and Japanese Market Gardening in the North and Central  
1430 Okanagan Valley, British Columbia. *BC Studies: The British Columbian*  
1431 *Quarterly* **200**:241-272.
- 1432 Leibold M. A., M. Holyoak, N. Mouquet, P. Amarasekare, J. M. Chase, M. F.  
1433 Hoopes, R. D. Holt, J. B. Shurin, R. Law, and D. Tilman. 2004. The  
1434 metacommunity concept: a framework for multi-scale community ecology.  
1435 *Ecology Letters* **7(7)**:601-613. [https://doi.org/10.1111/j.1461-](https://doi.org/10.1111/j.1461-0248.2004.00608.x)  
1436 [0248.2004.00608.x](https://doi.org/10.1111/j.1461-0248.2004.00608.x)
- 1437 Lewin-Koh N. J., R. Bivand, J. Pebesma, E. Archer, A. Baddeley, D. G.  
1438 Giraudoux, V. G. Rubio, P. Hausmann, K. O. Hufthammer, and T. Jagger.  
1439 2012. Package 'mapproj'. [http://cran.r-](http://cran.r-project.org/web/packages/mapproj/mapproj.pdf)  
1440 [project.org/web/packages/mapproj/mapproj.pdf](http://cran.r-project.org/web/packages/mapproj/mapproj.pdf)
- 1441 Li Y., L. Zhang, J. Qiu, J. Yan, L. Wan, P. Wang, N. Hu, W. Cheng, and B. Fu.  
1442 2017. Spatially explicit quantification of the interactions among ecosystem  
1443 services. *Landscape Ecology* **32(6)**:1181-1199.  
1444 <https://doi.org/10.1007/s10980-017-0527-6>
- 1445 Liu S., D. Wang, H. Li, W. Li, and Q. Wang. 2017. Ecological land fragmentation  
1446 evaluation and dynamic change of a typical black soil farming area in  
1447 northeast China. *Sustainability* **9(2)**:300. <https://doi.org/10.3390/su9020300>
- 1448 Lonsdorf E., T. Ricketts, C. Kremen, R. Winfree, S. Greenleaf, and N. Williams.  
1449 2011. Crop pollination services. Pages 168-187 *In* P. Kareiva, H. Tallis, T. H.  
1450 Ricketts, G. C. Daily, and S. Polasky, editors. *Natural Capital: Theory and*  
1451 *practice of mapping ecosystem services*, Oxford University Press, Oxford,  
1452 UK.
- 1453 Loomis J. 2002. Quantifying recreation use values from removing dams and  
1454 restoring free-flowing rivers: A contingent behavior travel cost demand  
1455 model for the Lower Snake River. *Water Resources Research* **38(6)**:2-1-2-  
1456 8. <https://doi.org/10.1029/2000WR000136>
- 1457 Loos J., P. Batáry, I. Grass, C. Westphal, S. Bänsch, A. B. Baillod, A. L. Hass, J.  
1458 Rosa, and T. Tschardt. 2019. Vulnerability of ecosystem services in  
1459 farmland depends on landscape management. Pages 91-96 *In* M. Schröter,

- 1460 A. Bonn, S. Klotz, R. Seppelt, C. Baessler, editors. Atlas of Ecosystem  
1461 Services, Springer, Cham. [https://doi.org/10.1007/978-3-319-96229-0\\_15](https://doi.org/10.1007/978-3-319-96229-0_15)
- 1462 Lorilla R. S., K. Poirazidis, S. Kalogirou, V. Detsis, and A. Martinis. 2018.  
1463 Assessment of the spatial dynamics and interactions among multiple  
1464 ecosystem services to promote effective policy making across  
1465 mediterranean island landscapes. *Sustainability* **10(9)**:3285.  
1466 <https://doi.org/10.3390/su10093285>
- 1467 Lyons K. G., C. Brigham, B. Traut, and M. W. Schwartz. 2005. Rare species and  
1468 ecosystem functioning. *Conservation Biology* **19(4)**:1019-1024.  
1469 <https://doi.org/10.1111/j.1523-1739.2005.00106.x>
- 1470 Maestre F. T., D. J. Eldridge, S. Soliveres, S. Kéfi, M. Delgado-Baquerizo, M. A.  
1471 Bowker, P. García-Palacios, J. Gaitán, A. Gallardo, and R. Lázaro. 2016.  
1472 Structure and functioning of dryland ecosystems in a changing world.  
1473 *Annual review of ecology, evolution, and systematics* **47**:215-237.  
1474 <https://doi.org/10.1146/annurev-ecolsys-121415-032311>
- 1475 Mäler K., S. Aniyar, and Å. Jansson. 2013. Accounting for the value of ecosystem  
1476 assets and their services. Pages 187-205 *In* R. M. Hassen and E. D.  
1477 Mungatana, editors. Implementing Environmental Accounts: Case Studies  
1478 from Eastern and Southern Africa, Springer, Dordrecht.  
1479 [https://doi.org/10.1007/978-94-007-5323-5\\_7](https://doi.org/10.1007/978-94-007-5323-5_7)
- 1480 Margosian M. L., K. A. Garrett, J. S. Hutchinson, and K. A. With. 2009.  
1481 Connectivity of the American agricultural landscape: assessing the national  
1482 risk of crop pest and disease spread. *Bioscience* **59(2)**:141-151.  
1483 <https://doi.org/10.1525/bio.2009.59.2.7>
- 1484 Marini L., M. Quaranta, P. Fontana, J. C. Biesmeijer, and R. Bommarco. 2012.  
1485 Landscape context and elevation affect pollinator communities in intensive  
1486 apple orchards. *Basic and Applied Ecology* **13(8)**:681-689.  
1487 <https://doi.org/10.1016/j.baae.2012.09.003>
- 1488 Mark D. M. 1984. Part 4: mathematical, algorithmic and data structure issues:  
1489 automated detection of drainage networks from digital elevation models.  
1490 *Cartographica: The International Journal for Geographic Information and*  
1491 *Geovisualization* **21**:168-178. [https://doi.org/10.3138/10LM-4435-6310-](https://doi.org/10.3138/10LM-4435-6310-1491)  
1492 [251R](https://doi.org/10.3138/10LM-4435-6310-1491)
- 1493 Matson P. A., W. J. Parton, A. G. Power, and M. J. Swift. 1997. Agricultural  
1494 intensification and ecosystem properties. *Science* **277**:504-509.  
1495 <https://doi.org/10.1126/science.277.5325.504>

- 1496 McRae B. H., B. G. Dickson, T. H. Keitt, and V. B. Shah. 2008. Using circuit  
1497 theory to model connectivity in ecology, evolution, and conservation.  
1498 *Ecology* **89(1)**:2712-2724. <https://doi.org/10.1890/07-1861.1>
- 1499 McRae B. H., P. Beier. 2007. Circuit theory predicts gene flow in plant and  
1500 animal populations. *Proceedings of the National Academy of Sciences of*  
1501 *the United States of America* **104(50)**:19885-19890.  
1502 <https://doi.org/10.1073/pnas.0706568104>
- 1503 MEA (Millennium Ecosystem Assessment). 2005. Ecosystems and human well-  
1504 being. Island Press, Washington, DC.
- 1505 Melles S., N. Jones, B. Schmidt, and B. Rayfield. 2011. A least-cost path  
1506 approach to stream delineation using lakes as patches and a digital  
1507 elevation model as the cost surface. *Procedia Environmental Sciences* **7**:240-  
1508 245. <https://doi.org/10.1016/j.proenv.2011.07.042>
- 1509 Melo D., B. Filgueiras, C. Iserhard, L. Iannuzzi, A. Freitas, and I. Leal. 2019. Effect  
1510 of habitat loss and fragmentation on fruit-feeding butterflies in the Brazilian  
1511 Atlantic Forest. *Canadian journal of zoology* **97(7)**:588-596.  
1512 <https://doi.org/10.1139/cjz-2018-0202>
- 1513 Middleton N., T. Sternberg. 2013. Climate hazards in drylands: A review. *Earth-*  
1514 *Science Reviews* **126**:48-57. <https://doi.org/10.1016/j.earscirev.2013.07.008>
- 1515 Mills A., M. Fey. 2004. Effects of vegetation cover on the tendency of soil to  
1516 crust in South Africa. *Soil Use and Management* **20(3)**:308-317.  
1517 <https://doi.org/10.1111/j.1475-2743.2004.tb00375.x>
- 1518 Mitchell M. G., E. M. Bennett, and A. Gonzalez. 2013. Linking landscape  
1519 connectivity and ecosystem service provision: current knowledge and  
1520 research gaps. *Ecosystems* **16**:894-908. [https://doi.org/10.1007/s10021-](https://doi.org/10.1007/s10021-013-9647-2)  
1521 [013-9647-2](https://doi.org/10.1007/s10021-013-9647-2)
- 1522 Mitchell M. G., K. Chan, N. K. Newlands, and N. Ramankutty. 2020. Spatial  
1523 Correlations Don't Predict Changes in Agricultural Ecosystem Services: A  
1524 Canada-Wide Case Study. *Frontiers in Sustainable Food Systems* **4**:235.  
1525 <https://doi.org/10.3389/fsufs.2020.539892>
- 1526 Mitchell M. G., A. F. Suarez-Castro, M. Martinez-Harms, M. Maron, C. McAlpine,  
1527 K. J. Gaston, K. Johansen, and J. R. Rhodes. 2015. Reframing landscape  
1528 fragmentation's effects on ecosystem services. *Trends in Ecology &*  
1529 *Evolution* **30(4)**:190-198. <https://doi.org/10.1016/j.tree.2015.01.011>

- 1530 Nassauer J. I., P. Opdam. 2008. Design in science: extending the landscape  
1531 ecology paradigm. *Landscape Ecology* **23**:633-644.  
1532 <https://doi.org/10.1007/s10980-008-9226-7>
- 1533 Neale T., J. Carmichael, and S. Cohen. 2007. Urban water futures: a multivariate  
1534 analysis of population growth and climate change impacts on urban water  
1535 demand in the Okanagan basin, BC. *Canadian Water Resources Journal*  
1536 **32(4)**:315-330. <https://doi.org/10.4296/cwrj3204315>
- 1537 Nelson E., G. Mendoza, J. Regetz, S. Polasky, H. Tallis, D. Cameron, K. M. Chan,  
1538 G. C. Daily, J. Goldstein, and P. M. Kareiva. 2009. Modeling multiple  
1539 ecosystem services, biodiversity conservation, commodity production, and  
1540 tradeoffs at landscape scales. *Frontiers in Ecology and the Environment*  
1541 **7(1)**:4-11. <https://doi.org/10.1890/080023>
- 1542 Nicholls C. I., M. A. Altieri. 2013. Plant biodiversity enhances bees and other  
1543 insect pollinators in agroecosystems. A review. *Agronomy for Sustainable*  
1544 *development* **33(2)**:257-274. <https://doi.org/10.1007/s13593-012-0092-y>
- 1545 Nicholson E., G. M. Mace, P. R. Armsworth, G. Atkinson, S. Buckle, T. Clements,  
1546 R. M. Ewers, J. E. Fa, T. A. Gardner, and J. Gibbons. 2009. Priority research  
1547 areas for ecosystem services in a changing world. *Journal of Applied*  
1548 *Ecology* **46(6)**:1139-1144. <https://doi.org/10.1111/j.1365-2664.2009.01716.x>
- 1550 Nilsson C., C. A. Reidy, M. Dynesius, and C. Revenga. 2005. Fragmentation and  
1551 flow regulation of the world's large river systems. *Science* **308**:405-408.  
1552 <https://doi.org/10.1126/science.1107887>
- 1553 Pal S., S. Talukdar. 2018. Application of frequency ratio and logistic regression  
1554 models for assessing physical wetland vulnerability in Punarbhaba river basin  
1555 of Indo-Bangladesh. *Human and Ecological Risk Assessment: An*  
1556 *International Journal* **24(5)**:1291-1311.  
1557 <https://doi.org/10.1080/10807039.2017.1411781>
- 1558 Pal S., P. Singha, K. Lepcha, S. Debanshi, S. Talukdar, and T. K. Saha. 2021.  
1559 Proposing multicriteria decision based valuation of ecosystem services for  
1560 fragmented landscape in mountainous environment. *Remote Sensing*  
1561 *Applications: Society and Environment* **21**:100454.  
1562 <https://doi.org/10.1016/j.rsase.2020.100454>
- 1563 Parks S. A., K. S. McKelvey, and M. K. Schwartz. 2013. Effects of weighting  
1564 schemes on the identification of wildlife corridors generated with least-cost  
1565 methods. *Conservation Biology* **27(1)**:145-154.  
1566 <https://doi.org/10.1111/j.1523-1739.2012.01929.x>

- 1567 Pebesma E., R. S. Bivand. 2005. Classes and methods for spatial data: the sp  
1568 package. *R news* **5**:9-13. <https://cran.r-project.org/package=sp>
- 1569 Peng J., Y. Yang, Y. Liu, Y. Du, J. Meersmans, and S. Qiu. 2018. Linking  
1570 ecosystem services and circuit theory to identify ecological security patterns.  
1571 *Science of the total environment* **644**:781-790.  
1572 <https://doi.org/10.1016/j.scitotenv.2018.06.292>
- 1573 Peron T., C. Comin, D. Amancio, L. da F Costa, F. Rodrigues, and J. Kurths.  
1574 2014. Correlations between climate network and relief data. *Nonlinear*  
1575 *Processes in Geophysics* **21(6)**:1127-1132. [https://doi.org/10.5194/npg-21-](https://doi.org/10.5194/npg-21-1127-2014)  
1576 [1127-2014](https://doi.org/10.5194/npg-21-1127-2014)
- 1577 Phalan B., M. Onial, A. Balmford, and R. E. Green. 2011. Reconciling food  
1578 production and biodiversity conservation: land sharing and land sparing  
1579 compared. *Science (New York, N.Y.)* **333**:1289-1291.  
1580 <https://doi.org/10.1126/science.1208742>
- 1581 Phillips J. D. 2013. Sources of spatial complexity in two coastal plain soil  
1582 landscapes. *Catena* **111**:98-103.  
1583 <https://doi.org/10.1016/j.catena.2013.07.003>
- 1584 Phillips J. D., W. Schwanghart, and T. Heckmann. 2015. Graph theory in the  
1585 geosciences. *Earth-Science Reviews* **143**:147-160.  
1586 <https://doi.org/10.1016/j.earscirev.2015.02.002>
- 1587 Phillips M. L., B. E. McNellis, M. F. Allen, and E. B. Allen. 2019. Differences in  
1588 root phenology and water depletion by an invasive grass explains  
1589 persistence in a Mediterranean ecosystem. *American Journal of Botany*  
1590 **106(9)**:1210-1218. <https://doi.org/10.1002/ajb2.1344>
- 1591 Phillips S. J., P. Williams, G. Midgley, and A. Archer. 2008. Optimizing dispersal  
1592 corridors for the Cape Proteaceae using network flow. *Ecological*  
1593 *Applications* **18**:1200-1211. <https://doi.org/10.1890/07-0507.1>
- 1594 Pinto N., T. H. Keitt. 2009. Beyond the least-cost path: evaluating corridor  
1595 redundancy using a graph-theoretic approach. *Landscape Ecology* **24**:253-  
1596 266. <https://doi.org/10.1007/s10980-008-9303-y>
- 1597 Poff N. L., J. D. Allan, M. B. Bain, J. R. Karr, K. L. Prestegard, B. D. Richter, R. E.  
1598 Sparks, and J. C. Stromberg. 1997. The natural flow regime. *Bioscience*  
1599 **47(11)**:769-784. <https://doi.org/10.2307/1313099>
- 1600 Potts S. G., J. C. Biesmeijer, C. Kremen, P. Neumann, O. Schweiger, and W. E.  
1601 Kunin. 2010. Global pollinator declines: trends, impacts and drivers. *Trends*

- 1602        *in ecology & evolution* **25(6)**:345-353.  
1603        <https://doi.org/10.1016/j.tree.2010.01.007>
- 1604        Power A. G. 2010. Ecosystem services and agriculture: tradeoffs and synergies.  
1605        *Philosophical transactions of the royal society B: biological sciences*  
1606        **365(1554)**:2959-2971. <https://doi.org/10.1098/rstb.2010.0143>
- 1607        Priess J. A., M. Mimler, A. Klein, S. Schwarze, T. Tschardt, and I. Steffan-  
1608        Dewenter. 2007. Linking deforestation scenarios to pollination services and  
1609        economic returns in coffee agroforestry systems. *Ecological Applications*  
1610        **17(2)**:407-417. <https://doi.org/10.1890/05-1795>
- 1611        Qin K., J. Li, and X. Yang. 2015. Trade-off and synergy among ecosystem  
1612        services in the Guanzhong-Tianshui Economic Region of China. *International*  
1613        *journal of environmental research and public health* **12(11)**:14094-14113.  
1614        <https://doi.org/10.3390/ijerph121114094>
- 1615        Qiu J., M. G. Turner. 2013. Spatial interactions among ecosystem services in an  
1616        urbanizing agricultural watershed. *Proceedings of the National Academy of*  
1617        *Sciences of the United States of America* **110**:12149-12154.
- 1618        Queiroz C., M. Meacham, K. Richter, A. V. Norström, E. Andersson, J. Norberg,  
1619        and G. Peterson. 2015. Mapping bundles of ecosystem services reveals  
1620        distinct types of multifunctionality within a Swedish landscape. *AMBIO*  
1621        **44**:89-101. <https://doi.org/10.1007/s13280-014-0601-0>
- 1622        R Development Core Team. 2013. R: A language and environment for statistical  
1623        computing. R Foundation for Statistical Computing, Vienna, Austria.  
1624        <http://www.R-project.org/>
- 1625        Raudsepp-Hearne C., G. D. Peterson. 2016. Scale and ecosystem services: how  
1626        do observation, management, and analysis shift with scale—lessons from  
1627        Québec. *Ecology and Society* **21(3)**. <https://www.jstor.org/stable/26269960>
- 1628        Rayfield B., M. Fortin, and A. Fall. 2011. Connectivity for conservation: a  
1629        framework to classify network measures. *Ecology* **92(4)**:847-  
1630        858. <https://doi.org/10.1890/09-2190.1>
- 1631        Redhead J. W., G. D. Powney, B. A. Woodcock, and R. F. Pywell. 2020. Effects  
1632        of future agricultural change scenarios on beneficial insects. *Journal of*  
1633        *environmental management* **265**:110550.  
1634        <https://doi.org/10.1016/j.jenvman.2020.110550>
- 1635        Renard D., J. M. Rhemtulla, and E. M. Bennett. 2015. Historical dynamics in  
1636        ecosystem service bundles. *Proceedings of the National Academy of*



- 1637 *Sciences of the United States of America* **112(43)**:13411-13416.  
1638 <https://doi.org/10.1073/pnas.1502565112>
- 1639 Reynolds J. F., D. M. Smith, E. F. Lambin, B. L. Turner 2nd, M. Mortimore, S. P.  
1640 Batterbury, T. E. Downing, H. Dowlatabadi, R. J. Fernandez, J. E. Herrick, E.  
1641 Huber-Sannwald, H. Jiang, R. Leemans, T. Lynam, F. T. Maestre, M. Ayarza,  
1642 and B. Walker. 2007. Global desertification: building a science for dryland  
1643 development. *Science* **316**:847-851.  
1644 <https://doi.org/10.1126/science.1131634>
- 1645 Ricketts T. H., J. Regetz, I. Steffan-Dewenter, S. A. Cunningham, C. Kremen, A.  
1646 Bogdanski, B. Gemmill-Herren, S. S. Greenleaf, A. M. Klein, and M. M.  
1647 Mayfield. 2008. Landscape effects on crop pollination services: are there  
1648 general patterns? *Ecology Letters* **11(5)**:499-  
1649 515. <https://doi.org/10.1111/j.1461-0248.2008.01157.x>
- 1650 Rieb J. T., R. Chaplin-Kramer, G. C. Daily, P. R. Armsworth, K. Böhning-Gaese,  
1651 A. Bonn, G. S. Cumming, F. Eigenbrod, V. Grimm, and B. M. Jackson. 2017.  
1652 When, where, and how nature matters for ecosystem services: challenges for  
1653 the next generation of ecosystem service models. *Bioscience* **67(9)**:820-833.  
1654 <https://doi.org/10.1093/biosci/bix075>
- 1655 Roa-García M., S. Brown, H. Schreier, and L. Lavkulich. 2011. The role of land  
1656 use and soils in regulating water flow in small headwater catchments of the  
1657 Andes. *Water Resources Research* **47(5)**.  
1658 <https://doi.org/10.1029/2010WR009582>
- 1659 Saha T. K., S. Pal. 2019. Emerging conflict between agriculture extension and  
1660 physical existence of wetland in post-dam period in Atreyee River basin of  
1661 Indo-Bangladesh. *Environment, Development and Sustainability* **21**:1485-  
1662 1505. <https://doi.org/10.1007/s10668-018-0099-x>
- 1663 Satake A., T. K. Rudel, and A. Onuma. 2008. Scale mismatches and their  
1664 ecological and economic effects on landscapes: A spatially explicit model.  
1665 *Global Environmental Change* **18(4)**:768-775.  
1666 <https://doi.org/10.1016/j.gloenvcha.2008.07.007>
- 1667 Schlesinger W. H., J. F. Reynolds, G. L. Cunningham, L. F. Huenneke, W. M.  
1668 Jarrell, R. A. Virginia, and W. G. Whitford. 1990. Biological feedbacks in  
1669 global desertification. *Science* **247**:1043-1048.  
1670 <https://doi.org/10.1126/science.247.4946.1043>
- 1671 Schröter M., A. Bonn, S. Klotz, R. Seppelt, and C. Baessler. 2019. Atlas of  
1672 Ecosystem Services: Drivers, Risks, and Societal Responses. Springer, Cham.

- 1673 Seavy N. E., T. Gardali, G. H. Golet, F. T. Griggs, C. A. Howell, R. Kelsey, S. L.  
1674 Small, J. H. Viers, and J. F. Weigand. 2009. Why climate change makes  
1675 riparian restoration more important than ever: recommendations for practice  
1676 and research. *Ecological Restoration* **27(3)**:330-338.  
1677 <http://doi.org/10.3368/er.27.3.330>
- 1678 Simmonds J. S., B. J. van Rensburg, A. I. Tulloch, and M. Maron. 2019.  
1679 Landscape-specific thresholds in the relationship between species richness  
1680 and natural land cover. *Journal of Applied Ecology* **56(4)**:1019-1029.  
1681 <https://doi.org/10.1111/1365-2664.13320>
- 1682 Singleton P. H. 2002. Landscape permeability for large carnivores in  
1683 Washington: a geographic information system weighted-distance and least-  
1684 cost corridor assessment. US Department of Agriculture, Forest Service,  
1685 Pacific Northwest Research Station, PNW-RP-549.
- 1686 Stritih A., P. Bebi, and A. Grêt-Regamey. 2019. Quantifying uncertainties in earth  
1687 observation-based ecosystem service assessments. *Environmental*  
1688 *modelling & software* **111**:300-310.  
1689 <https://doi.org/10.1016/j.envsoft.2018.09.005>
- 1690 Su C., B. Fu. 2013. Evolution of ecosystem services in the Chinese Loess Plateau  
1691 under climatic and land use changes. *Global and Planetary Change*  
1692 **101**:119-128. <https://doi.org/10.1016/j.gloplacha.2012.12.014>
- 1693 Suding K. N., S. Lavorel, F. Chapin Iii, J. H. Cornelissen, S. Diaz, E. Garnier, D.  
1694 Goldberg, D. U. Hooper, S. T. Jackson, and M. Navas. 2008. Scaling  
1695 environmental change through the community-level: A trait-based response-  
1696 and-effect framework for plants. *Global Change Biology* **14(5)**:1125-1140.  
1697 <https://doi.org/10.1111/j.1365-2486.2008.01557.x>
- 1698 Tallis H., S. Polasky. 2009. Mapping and valuing ecosystem services as an  
1699 approach for conservation and natural resource management. *Annals of the*  
1700 *New York Academy of Sciences* **1162**:265-283.  
1701 <https://doi.org/10.1111/j.1749-6632.2009.04152.x>
- 1702 Tallis H., P. Kareiva, M. Marvier, and A. Chang. 2008. An ecosystem services  
1703 framework to support both practical conservation and economic  
1704 development. *Proceedings of the National Academy of Sciences of the*  
1705 *United States of America* **105(28)**:9457-9464.  
1706 <https://doi.org/10.1073/pnas.0705797105>
- 1707 Taylor P. D., L. Fahrig, K. Henein, and G. Merriam. 1993. Connectivity is a vital  
1708 element of landscape structure. *Oikos* **68(3)**:571-573.  
1709 <https://doi.org/10.2307/3544927>



- 1710 Tilman D., K. G. Cassman, P. A. Matson, R. Naylor, and S. Polasky. 2002.  
1711 Agricultural sustainability and intensive production practices. *Nature*  
1712 **418**:671-677. <https://doi.org/10.1038/nature01014>
- 1713 Tomscha S. A., S. E. Gergel. 2016. Ecosystem service trade-offs and synergies  
1714 misunderstood without landscape history. *Ecology and Society* **21(1)**:43.  
1715 <https://www.jstor.org/stable/26270345>
- 1716 Transboundary Connectivity Group. 2016. Providing a regional connectivity  
1717 perspective to local connectivity conservation decisions in the British  
1718 Columbia– Washington transboundary region: Okanagan-Kettle subregion  
1719 connectivity assessment. Great Northern Landscape Conservation  
1720 Cooperative.
- 1721 Tschardt T., R. Brandl. 2004. Plant-insect interactions in fragmented  
1722 landscapes. *Annual Reviews in Entomology* **49**:405-430.  
1723 <https://doi.org/10.1146/annurev.ento.49.061802.123339>
- 1724 Tschardt T., A. M. Klein, A. Krüss, I. Steffan-Dewenter, and C. Thies. 2005.  
1725 Landscape perspectives on agricultural intensification and biodiversity–  
1726 ecosystem service management. *Ecology Letters* **8(8)**:857-874.  
1727 <https://doi.org/10.1111/j.1461-0248.2005.00782.x>
- 1728 Turner W. R., K. Brandon, T. M. Brooks, R. Costanza, G. A. Da Fonseca, and R.  
1729 Portela. 2007. Global conservation of biodiversity and ecosystem services.  
1730 *Bioscience* **57(1)**:868-873. <https://doi.org/10.1641/B571009>
- 1731 Urban D. L., E. S. Minor, E. A. Treml, and R. S. Schick. 2009. Graph models of  
1732 habitat mosaics. *Ecology Letters* **12(3)**:260-273.  
1733 <https://doi.org/10.1111/j.1461-0248.2008.01271.x>
- 1734 Van Berkel D. B., P. H. Verburg. 2014. Spatial quantification and valuation of  
1735 cultural ecosystem services in an agricultural landscape. *Ecological*  
1736 *Indicators* **37**:163-174. <https://doi.org/10.1016/j.ecolind.2012.06.025>
- 1737 Van der Ploeg S, De Groot RS, Wang Y. 2010. The TEEB Valuation Database:  
1738 overview of structure, data and results. Wageningen, The Netherlands:  
1739 Foundation for Sustainable Development. Foundation for Sustainable  
1740 Development, Wageningen, Netherlands. **NO DOI**
- 1741 van Etten J. 2017. R package gdistance: distances and routes on geographical  
1742 grids. *Journal of Statistical Software* **76**:1-21.  
1743 <https://doi.org/10.18637/jss.v076.i13>
- 1744 van Zanten B. T., I. Zasada, M. J. Koetse, F. Ungaro, K. Häfner, and P. H.  
1745 Verburg. 2016. A comparative approach to assess the contribution of

- 1746 landscape features to aesthetic and recreational values in agricultural  
1747 landscapes. *Ecosystem Services* **17**:87-98.  
1748 <https://doi.org/10.1016/j.ecoser.2015.11.011>
- 1749 Verburg P. H., J. Van De Steeg, A. Veldkamp, and L. Willemen. 2009. From land  
1750 cover change to land function dynamics: a major challenge to improve land  
1751 characterization. *Journal of environmental management* **90(3)**:1327-1335.  
1752 <https://doi.org/10.1016/j.jenvman.2008.08.005>
- 1753 Wagner J. R. 2008. Landscape aesthetics, water, and settler colonialism in the  
1754 Okanagan Valley of British Columbia. *Journal of Ecological Anthropology*  
1755 **12(1)**:22-38. <http://dx.doi.org/10.5038/2162-4593.12.1.2>
- 1756 Wagner J. R., K. White. 2009. Water and development in the Okanagan Valley  
1757 of British Columbia. *Journal of Enterprising Communities: People and Places*  
1758 *in the Global Economy* **3(4)**:378-392.
- 1759 Wallace K. J. 2007. Classification of ecosystem services: problems and solutions.  
1760 *Biological Conservation* **139(3-4)**:235-246.  
1761 <https://doi.org/10.1016/j.biocon.2007.07.015>
- 1762 Warman L. D., D. M. Forsyth, A. Sinclair, K. Freemark, H. D. Moore, T. W.  
1763 Barrett, R. L. Pressey, and D. White. 2004. Species distributions, surrogacy,  
1764 and important conservation regions in Canada. *Ecology Letters* **7**:374-379.
- 1765 Werling B. P., T. L. Dickson, R. Isaacs, H. Gaines, C. Gratton, K. L. Gross, H.  
1766 Liere, C. M. Malmstrom, T. D. Meehan, L. Ruan, B. A. Robertson, G. P.  
1767 Robertson, T. M. Schmidt, A. C. Schrotenboer, T. K. Teal, J. K. Wilson, and  
1768 D. A. Landis. 2014. Perennial grasslands enhance biodiversity and multiple  
1769 ecosystem services in bioenergy landscapes. *Proceedings of the National*  
1770 *Academy of Sciences of the United States of America* **111(4)**:1652-1657.  
1771 <https://doi.org/10.1073/pnas.1309492111>
- 1772 Whittaker D., B. Shelby. 2002. Evaluating instream flows for recreation: Applying  
1773 the structural norm approach to biophysical conditions. *Leisure Sciences*  
1774 **24(3-4)**:363-374. <https://doi.org/10.1080/01490400290050808>
- 1775 Wickham H. 2010. Stringr: modern, consistent string processing. *The R Journal*  
1776 **2**:38-40. <https://doi.org/10.32614/RJ-2010-012>
- 1777 Xinxin L. 2017. Study on Spatial Heterogeneity of Urban Landscape  
1778 Fragmentation in Changsha. *Environmental Science and Management* **1**:9.
- 1779 Zhang W., T. H. Ricketts, C. Kremen, K. Carney, and S. M. Swinton. 2007.  
1780 Ecosystem services and dis-services to agriculture. *Ecological Economics*  
1781 **64(2)**:253-260. <https://doi.org/10.1016/j.ecolecon.2007.02.024>

1782

1783

## 1784 **Appendices**

### 1785 **Appendix 1**

#### 1786 **Background information**

1787 *ES interactions*: Other work has defined ‘interactions’ as value-based synergies  
1788 (increase in supply quality and/or quantity of one ES results in supply increase of  
1789 another), trade-offs (increase in supply of one ES results in decrease of another;  
1790 Bennett et al. 2009), bundles (groups of ES that co-occur repeatedly across a  
1791 landscape, typically linked to co-variation in LULC types; Raudsepp-Hearne et al.  
1792 2010, Lee and Lautenbach 2016), or flows (ES interactions from the perspective  
1793 of beneficiaries) between ES that occur over the same space and time (Agudelo  
1794 et al. 2020).

1795

1796 *ES supply*: We note that, although we use the term ‘supply’ to refer to the  
1797 portion of the ES provisioning delivery chain on which we are focused, two of  
1798 the ES we have selected can be conceptualized as spanning both the supply  
1799 and ‘flow’ aspects of this chain. ES supply refers to the ecological good(s) and  
1800 service(s) produced by a natural or man-made area on the landscape (Potschin  
1801 et al. 2016), whereas ES flow represents human access to ES supplies, i.e., the  
1802 transfer of a good and/or service from a supply to a benefit area or actor for use  
1803 (Villamagna et al. 2013, Schröter et al. 2018, Schirpke et al. 2019, Vallecillo et al.  
1804 2019). For agriculture and landscape aesthetics, human action is typically  
1805 required for these services to actually flow to beneficiaries, e.g., produce being  
1806 shipped to grocers; people venturing into nature to enjoy beautiful viewsapes.  
1807 However, in the case of aesthetics, the data on which we based our mapping  
1808 was informed by a viewshed analysis, which spatially quantified the potential for

1809 people to actually see areas all across the landscape, thereby incorporating an  
1810 ES flow component. In the context of preventing or minimizing the impacts of  
1811 flooding, waterflow regulation is provided (i.e., flows from supply to demand  
1812 areas) when a supply area limits or delays the flow of water (Luck et al. 2009),  
1813 which is typically a temporal dynamic dependent on seasonal temperature  
1814 and/or weather patterns. Although the existing ES maps we use in this study are  
1815 static spatial representations of potential supply areas, in the cases of waterflow  
1816 regulation and landscape aesthetics, the distribution of potential spatial location  
1817 of flows will still be captured by this mapping. Note also that ES flows are not  
1818 equivalent to ES connectivity, the latter of which we are defining by the  
1819 functional ecological interrelationships between different supply areas.

1820

## 1821 **Appendix 2**

### 1822 **Original ES supply area mapping summary**

1823 Below we summarize the procedures for primary- and proxy-based mapping of  
1824 the three ES used in our study, originally produced by Field et al. (2017).  
1825 Ecosystem attributes were mapped, and their potential contribution to ES  
1826 supply quantified, based on environmental functions that are known to underpin  
1827 ES production; on explicit incorporation of perceived benefits to humans; or a  
1828 combination of the two methods (Fig. 3; Jakeman and Letcher 2003, Vigerstol  
1829 and Aukema 2011, Field et al. 2017). Spatial data sources for original maps  
1830 included LULC indicators, remote sensing image interpretation, and were  
1831 supported by some field-validations. For analytical consistency, raster data for  
1832 original mapping were resampled to ~29 m x 29 m resolution and assigned the  
1833 identical spatial projection. Original maps were created using ArcMap 10.2 and

1834 10.4 (ESRI 2011), and R (R Core Team 2013). For additional details see Field et  
1835 al. (2017); data are available on the Open Science Framework (OSF; Field 2021).

1836

1837 Plant food agriculture (PA) is an economically and culturally important ES in our  
1838 study area (e.g., Okanagan Valley Economic Development Society 2013, Kyle  
1839 2018), and its supply was mapped based on the spatial extent of all crop types  
1840 used directly for human nutrition. These include tree fruits; vines and grapes;  
1841 cereals and oilseeds; rotation crops; vegetables; berries; nut trees; and specialty  
1842 foods, all of which are concentrated primarily in valley-bottom areas (Field et al.  
1843 2017). From these data, we dissolved boundaries between adjacent Agricultural  
1844 Land Use Inventory (ALUI) polygons which, in some cases, resulted in different  
1845 crop types being merged into a single node (MoAg 2017). We did this to  
1846 generalize the mapping of connectivity between PA as a whole, and the other  
1847 ES considered in this study, as the rationale for the mechanistic connections  
1848 between PA and the other ES were consistent for all crop types. This outcome  
1849 fits with our method of PA supply area valuation, which is based solely on  
1850 potential crop area (ha) and not on crop type.

1851

1852 The terrestrial areas that provide waterflow regulation (WF) were mapped as a  
1853 function of soil texture, slope, land use and land cover (LULC)-specific  
1854 perviousness, and functionally relevant ecosystem types including floodplains,  
1855 riparian areas, wetlands, and seasonally flooded fields ('influential landscape  
1856 features' - 'ILF' herein). WF supply areas were defined as those that sustain water  
1857 delivery in dedicated areas, and protect against flooding and draughts, both of  
1858 which are persistent environmental concerns in the study region (Haughian et al.  
1859 2012). Several wetland areas were excluded from the Field et al. (2017) WF map

1860 due to the absence of soil texture data, which was one of the inputs for the  
1861 waterflow infiltration model. Because wetlands are so critical to supporting WF  
1862 and are relevant to connectivity mechanisms with several other ES, we added  
1863 these areas back to our WF map by re-running the infiltration model under the  
1864 assumption that all wetland areas without soils data have 100% saturated  
1865 hydraulic conductivity, and then applying an ILF multiplier per Field et al. (2017).  
1866 These resulting raster values ranged from 19 to 1200 (mean = 237.7; st.dev =  
1867 120.1), and wetlands coincident with mapped floodplains provided the highest-  
1868 value WF supply areas in the region.

1869

1870 Lastly, landscape aesthetics (LA) supply areas were mapped based on models of  
1871 perceived values of different LULC types in the region, on 'visual condition'  
1872 ranging from preserved to manicured lands, and on the visibility of areas from  
1873 various viewpoints across the case study region. LA supply areas spanned both  
1874 terrestrial and large aquatic (i.e., lakes, rivers, manmade reservoirs) areas. We  
1875 did not separate adjacent terrestrial from aquatic LA supply areas as 13 LULC  
1876 (10 terrestrial; 3 aquatic) values were used as input for original LA mapping, in  
1877 conjunction with two other valuation methods (i.e., tourism brochure  
1878 assessment; viewshed analysis), and we aimed to keep supply area delineation  
1879 methodologically as consistent as possible across different ES types (e.g., for  
1880 amalgamation of immediately adjacent supply areas).

1881

### 1882 **Appendix 3**

1883 **Major watersheds and sub-basins within and surrounding the case study**  
1884 **landscape.**

1885 Due to the large file size of the waterflow regulation (WF) data, supply area  
1886 delineation steps were run separately for identified sub-basins (n = 118) in our  
1887 case study area. To identify sub-basin catchment areas, we used BC Major  
1888 Watershed, Fresh Water Atlas (FWA) Watersheds, and FWA Streams datasets  
1889 (FLNRO 2017; see Field et al. 2017 for data source descriptions; datasets  
1890 available at <https://www.data.gov.bc.ca/>). For major watersheds with significant  
1891 (or complete) overlap with our study area, which would result in a large number  
1892 of within-basin ES supply areas and therefore potentially lead to computational  
1893 limitations, nested sub-basins were identified. These major watersheds included  
1894 Kettle (west), Okanagan, Similkameen, and South Thompson rivers (Appendix B).  
1895 FWA Watersheds with a common terminus into valley bottom waterbodies,  
1896 verified using the FWA Streams dataset (FLNRO 2017), were merged. Several of  
1897 the major watersheds (Columbia, Fraser, Kettle (east), Thompson, and  
1898 Washington (Coast) rivers) overlapped with our study area primarily along its  
1899 border; the overlapping portions of these watersheds were clipped and added  
1900 to the sub-basin dataset (see Appendix B map). The high-value WF raster was  
1901 then split by sub-basins using the nearest neighbour sampling technique and  
1902 Split Raster tool in ArcMap. Each major watershed was assigned a unique 'goal'  
1903 point location for LCP analyses, i.e., sub-basins within a major watershed shared  
1904 the same goal point. In some cases, the mapped borders of the BC Major  
1905 Watersheds and FWA Watersheds did not exhibit perfect overlap; therefore,  
1906 following the high-value WF split exercise, the ArcGIS Erase tool was run by  
1907 erasing the spatial extent of sub-basins from other BC Major Watersheds where  
1908 they overlap. This ensured that WF supply areas were assigned to sub-basins by  
1909 prioritizing the more detailed FWA Watershed dataset.



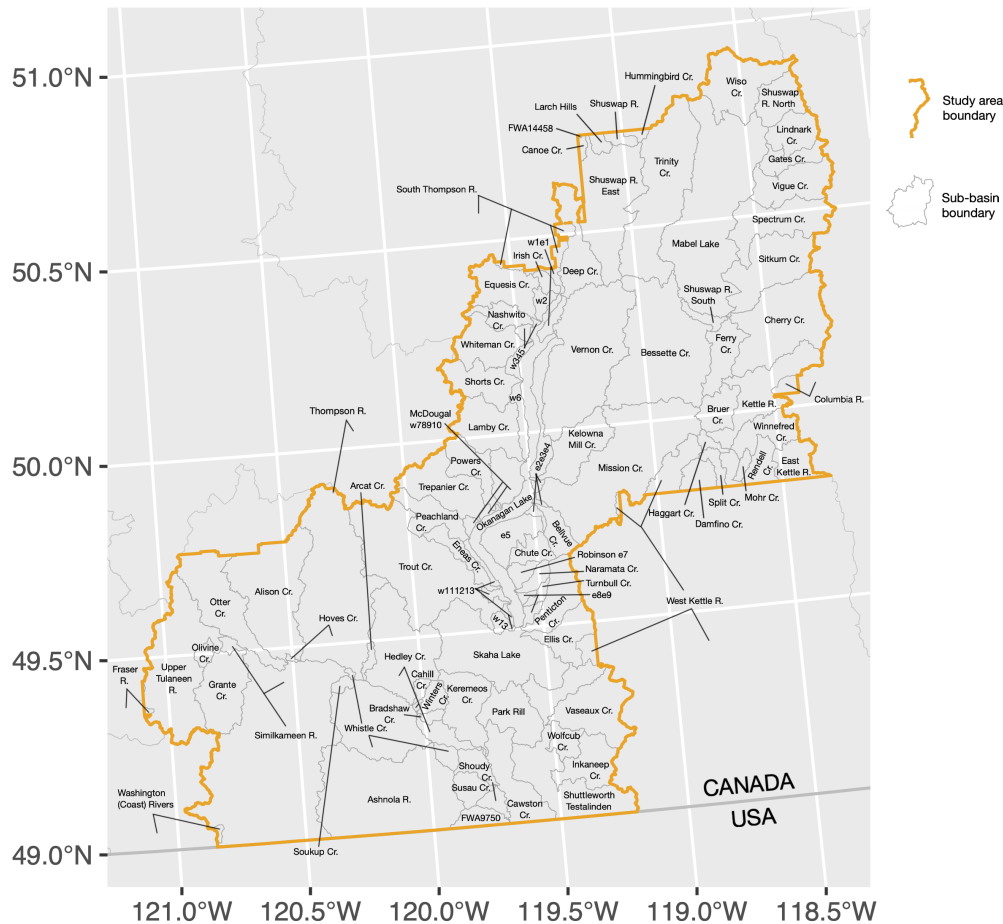

1910

1911 Appendix 3 - Figure 1. Map of major watersheds and sub-basins within and  
1912 surrounding the case study landscape in southern interior British Columbia,  
1913 Canada.

1914

1915 **Appendix 4**

1916 **Detailed methods for building pairwise topographic corridors**

1917 Once initial LCPs were created, segments of LCP lines were erased where they  
1918 were overlapped by a non-origin ES supply area polygon, and resulting

1919 disconnected lines were made into separate line features. Next, we deleted any



1920 lines that were deemed invalid from the perspective of real-world ES  
1921 connectivity. Specifically, any resulting lines that intersected with the sub-basin  
1922 goal point were deleted as we were only interested in retaining connections  
1923 between pairs of ES supply areas. Certain ES polygons with an irregular shape  
1924 had a centroid external to their polygon coverage, which resulted in line  
1925 segments that initiated at the origin polygon centroid and terminated on the  
1926 origin polygon border; these were also deleted as they did not represent links  
1927 between a pair of ES supply areas. Irregular shaped nodes also sometimes  
1928 yielded lines that were connected between two points on the parent-polygon  
1929 border. These were retained to account for real-world feedbacks that may help  
1930 maintain a supply area; however, we ensured that any such lines associated with  
1931 two borders of an intersected polygon (i.e., where the line segment was part of  
1932 a non-origin polygon) were deleted to avoid duplication with feedback links  
1933 identified when separate analyses were run with the intersected polygon (in this  
1934 example) as the origin (Fig. 6b).

1935

1936 For topographic corridor mapping we needed to address various rare analytical  
1937 outcomes that became evident upon manual model validation. The LCP  
1938 analyses resulted in some connections that violated landscape topography. For  
1939 example, some LCPs from WF supply areas associated with relatively flat lands in  
1940 the headwaters of one sub-basin (Bellevue Creek) were found to flow south to  
1941 Okanagan Lake rather than flowing north as they would in reality (Appendix 2).  
1942 This was due to the necessity of balancing the smallest possible raster resolution  
1943 (20 m) with the overall large size of the study area for computational efficiency.  
1944 As individual sub-basins were analyzed separately for topographic links, invalid  
1945 linkages between sub-basins were not possible; however, we manually

1946 inspected all LCP results and removed any LCPs that violated downslope flow  
1947 logic from subsequent analyses. Further, we did not incorporate certain rare  
1948 spatial occurrences. These included instances of a smaller supply area inside  
1949 bigger one; centroids captured by the incorrect buffer due to two or more  
1950 centroids occurring close to one another; and LCP segments that resulted in  
1951 feedback loops that occurred across non-origin supply areas (these loops were  
1952 likely retained as feedback loops when such nodes served as LCP origins).

1953

1954

## 1955 **Appendix 5**

### 1956 **R script files (available on the OSF; Field 2021).**

- 1957 i. TOP-VALUE SUPPLY AREA NODE CREATION (file name:  
1958 'nodes\_waterflow\_FORMAT.R')
- 1959 ii. OVERLAP LINK CREATION (file name: 'links(overlap)\_waterflow <>  
1960 plantag\_MASTER\_FORMAT.R')
- 1961 iii. SUPPLY AREA CENTROID CREATION (PREP FOR LEAST COST PATH 'LCP'  
1962 ANALYSES) (file name: 'links\_waterflow\_ALL\_centroids\_FORMAT.R')
- 1963 iv. CREATE LCP GOAL POINTS FOR EACH SUB-BASIN/MAJOR WATERSHED  
1964 (file name: 'links\_waterflow\_ALL\_LCP goal pts\_FORMAT.R')
- 1965 v. LEAST COST PATH 'LCP' ANALYSIS FOR TOPOGRAPHIC LINK CREATION  
1966 (file name: 'links\_waterflow\_okanagan\_LCPs\_SUBBASIN\_FORMAT.R')
- 1967 vi. TOPOGRAPHIC LINK CREATION (file name:  
1968 'links\_waterflow\_okanagan\_1\_MASTER\_FORMAT.R')
- 1969 vii. INFLUENTIAL LANDSCAPE FEATURES (ILF) LINKS (file name:  
1970 'links\_waterflow\_okanagan\_LCPs\_ILF\_FORMAT.R')

1971

1972 **Appendix 6**

1973 **Study limitations**

1974 We identified three primary limitations of our approach. Firstly, we only included  
1975 three ES in our study and comparisons. Therefore, we are limited in the  
1976 generalizations we can make, especially as they pertain to the specific locations,  
1977 LULC- and ecosystem-relevance of the potential for connectivity 'hotspots'.  
1978 Investigating a limited number of ES is common among studies that model  
1979 interactions among ES (Agudelo et al. 2020), with data limitations, complexity of  
1980 socio-ecological process involved, and methodological gaps cited as barriers to  
1981 inclusion of all ES (Kolosz et al. 2018). However, our choice to test only three ES  
1982 was motivated by our goal to provide a straightforward case study of how each  
1983 of the three broad ES categories (i.e., non 'supporting'; MEA 2005) can be  
1984 represented in the same study. Our approach is easily adaptable to including an  
1985 unlimited number of ES, though the complexity in representing the functional  
1986 connections between them will may increase disproportionately to the number  
1987 of ES included, and limited data and/or gaps in our understanding of interaction  
1988 mechanisms may preclude modelling of certain pairwise relationships (Field and  
1989 Parrott 2017). Secondly, we only identified synergistic interactions among the  
1990 case study ES we included, but no trade-offs were represented in our case  
1991 study. The presence of potential trade-offs, as well as ecosystem dis-services  
1992 (e.g., competition for water and pollination among different LULC types; spread  
1993 of pests and diseases; Zhang et al. 2007), is of critical importance to informing  
1994 management, as the optimization of all ES on a landscape is usually not  
1995 simultaneously possible (e.g., Qiu and Turner 2013). We encourage future  
1996 applications of our approach to represent trade-offs and negatively-valued  
1997 functional connections between ES.

1998

1999 Lastly, we do not incorporate a measurement of uncertainty into our approach.  
2000 For example, we did not attempt to directly assess spatial autocorrelation of our  
2001 functional connectivity models with any other, potentially influential ecological  
2002 processes, as we were interested in providing straight-forward and replicable  
2003 rationale for mapping linkages; however, this precluded us from being able to  
2004 parse the presence of shared drivers and potential artefacts in proxy or primary  
2005 data. Additionally, the location and value of the identified connectivity corridors  
2006 may be driven by the assumptions of original ES mapping and the threshold (top  
2007 50%) we used to delineate high-value supply areas. Several publications have  
2008 suggested that incorporating uncertainty measures is necessary for producing  
2009 reliable results to support decision making, and will lead to improved  
2010 understanding of the system under study through identification of the most  
2011 compelling findings (Seppelt et al. 2011, Hamel and Bryant 2017, Stritih et al.  
2012 2018). Sources of uncertainty considered in ES assessments are related to  
2013 models of ecological processes; subjective choices of researchers and/or  
2014 participants; and practical modelling skills and data quality (Gos and Lavorel  
2015 2012, Burkhard et al. 2013, Hou et al. 2018, Wang et al. 2018). To date, only a  
2016 limited number of studies on ES interactions have incorporated measures of  
2017 uncertainty and/or model validation (Boerema et al. 2017, Agudelo et al. 2020).  
2018 As unconfirmed results are difficult to reliably assess, they are not as useful for  
2019 direct practical applications (Agudelo et al. 2020). Studies with the express  
2020 purpose of providing guidance for on-the-ground multi-ES planning should  
2021 therefore incorporate metrics of uncertainty and model validation procedures.

2022

2023 **Appendix 7**

2024 **Distribution of major LULC types across the case study region.**

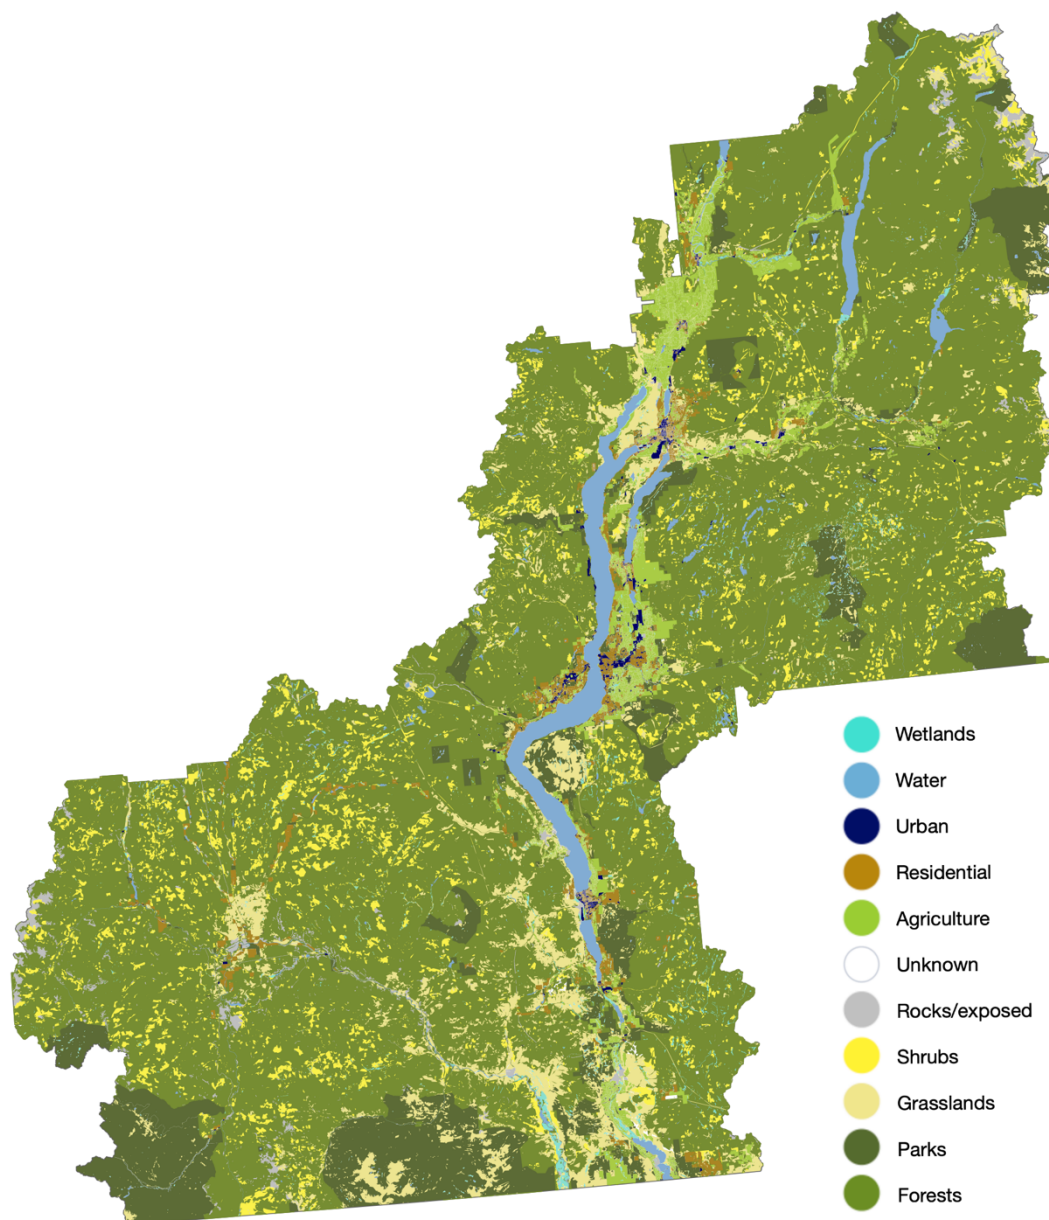

2025

2026 Appendix 7 - Figure 1. Map of the distribution of major LULC types across the  
2027 case study region.

2028

2029 **Appendix 8**

2030 **Summary tables of total areas and proportional coverages for major LULC**  
 2031 **types within each ES supply area and link type.**

2032 **Appendix 8 - Table 1. Percent of LULC overlapped by each ES supply area.**

| LULC Type            | Total area (ha) | Study Area | High Value Supply Areas (Top 50%) |                 |           |                  |                 |           |                  |                 |       |
|----------------------|-----------------|------------|-----------------------------------|-----------------|-----------|------------------|-----------------|-----------|------------------|-----------------|-------|
|                      |                 |            | PA                                |                 |           | WF               |                 |           | LA               |                 |       |
|                      |                 |            | 2158001                           | 12606           |           |                  | 922425          |           |                  | 1456241         |       |
|                      | % of study area | Area (ha)  | % of supply area                  | % of total LULC | Area (ha) | % of supply area | % of total LULC | Area (ha) | % of supply area | % of total LULC |       |
| Forest (incl. parks) | 1654215         | 76.65      | 30.85                             | 0.24            | 1.86e-03  | 725852.30        | 78.69           | 43.88     | 1354434.00       | 93.01           | 81.88 |
| Park                 | 255964          | 11.86      | 4.25e-06                          | 0               | 0         | 129588.70        | 14.05           | 50.63     | 190476.70        | 13.08           | 74.42 |
| Grassland            | 147610          | 6.84       | 0.12                              | 9.80e-04        | 8.37e-05  | 72050.87         | 7.81            | 48.81     | 3783.53          | 0.26            | 2.56  |
| Shrub                | 124953          | 5.79       | 0                                 | 0               | 0         | 53425.76         | 5.79            | 42.76     | 3889.10          | 0.27            | 3.11  |
| Agriculture          | 79769           | 3.70       | 12605.44                          | 100.00          | 15.80     | 31338.00         | 3.40            | 39.29     | 241.00           | 0.02            | 0.30  |
| Water                | 64272           | 2.98       | 0                                 | 0               | 0         | 0                | 0               | 0         | 63469.20         | 4.36            | 98.75 |
| Residential          | 34897           | 1.62       | 3.08e-04                          | 0               | 0         | 10990.55         | 1.19            | 31.49     | 241.44           | 0.02            | 0.69  |
| Rock / exposed       | 27373           | 1.27       | 2.78e-04                          | 0               | 0         | 5387.80          | 0.58            | 19.68     | 779.82           | 0.05            | 2.85  |
| Wetland              | 18207           | 0.84       | 9.44e-06                          | 0               | 0         | 18128.12         | 1.97            | 99.57     | 12586.06         | 0.86            | 69.13 |
| Urban                | 6187            | 0.29       | 0                                 | 0               | 0         | 1918.28          | 0.21            | 31.01     | 27.75            | 1.91e-03        | 0.45  |
| Unknown              | 1291            | 0.06       | 1.72                              | 0.01            | 0.13      | 473.51           | 0.05            | 36.67     | 52.74            | 3.62e-03        | 4.08  |

2033

2034

2035 **Appendix 8 - Table 2. Percent of LULC overlapped by each topographic link.**

| LULC Type            | Total area (ha) | Study Area | Topographic Links |                 |           |                |                 |           |                |                 |      |
|----------------------|-----------------|------------|-------------------|-----------------|-----------|----------------|-----------------|-----------|----------------|-----------------|------|
|                      |                 |            | WF -> PA          |                 |           | WF -> WF       |                 |           | WF -> LA       |                 |      |
|                      |                 |            | 2158001           | 4079            |           |                | 44449           |           |                | 4695            |      |
|                      | % of study area | Area (ha)  | % of link area    | % of total LULC | Area (ha) | % of link area | % of total LULC | Area (ha) | % of link area | % of total LULC |      |
| Forest (incl. parks) | 1654215         | 76.65      | 2205.94           | 54.08           | 0.13      | 19069.77       | 42.90           | 1.15      | 2688.56        | 57.26           | 0.16 |
| Park                 | 255964          | 11.86      | 438.39            | 10.75           | 0.17      | 3146.14        | 7.08            | 1.23      | 682.44         | 14.54           | 0.27 |
| Grassland            | 147610          | 6.84       | 433.05            | 10.62           | 0.29      | 3065.90        | 6.90            | 2.08      | 477.85         | 10.18           | 0.32 |
| Shrub                | 124953          | 5.79       | 102.67            | 2.52            | 0.08      | 1230.22        | 2.77            | 0.98      | 195.80         | 4.17            | 0.16 |
| Agriculture          | 79769           | 3.70       | 807.02            | 19.79           | 1.01      | 2329.46        | 5.24            | 2.92      | 596.03         | 12.70           | 0.75 |
| Water                | 64272           | 2.98       | 127.65            | 3.13            | 0.20      | 15664.49       | 35.24           | 24.37     | 184.83         | 3.94            | 0.29 |
| Residential          | 34897           | 1.62       | 218.51            | 5.36            | 0.63      | 1368.65        | 3.08            | 3.92      | 304.98         | 6.50            | 0.87 |
| Rock / exposed       | 27373           | 1.27       | 46.70             | 1.14            | 0.17      | 671.99         | 1.51            | 2.45      | 112.70         | 2.40            | 0.41 |
| Wetland              | 18207           | 0.84       | 56.51             | 1.39            | 0.31      | 732.48         | 1.65            | 4.02      | 51.79          | 1.10            | 0.28 |
| Urban                | 6187            | 0.29       | 43.92             | 1.08            | 0.71      | 185.53         | 0.42            | 3.00      | 45.69          | 0.97            | 0.74 |
| Unknown              | 1291            | 0.06       | 1.07              | 0.03            | 0.08      | 2.83           | 0.01            | 0.22      | 1.72           | 0.04            | 0.13 |

2036

2037

2038 **Appendix 8 - Table 3. Percent of LULC overlapped by each overlapping links.**

| LULC Type            | Total area (ha) | Study Area           | Overlapping Links |                |           |                |                 |           |                |                 |           |                |                 |           |                |                 |       |
|----------------------|-----------------|----------------------|-------------------|----------------|-----------|----------------|-----------------|-----------|----------------|-----------------|-----------|----------------|-----------------|-----------|----------------|-----------------|-------|
|                      |                 |                      | PA -> LA          |                |           | PA -> WF       |                 |           | WF -> PA       |                 |           | WF -> LA       |                 |           | LA -> WF       |                 |       |
|                      |                 |                      | 2158001           | 8.57024        |           | 4747.30300     |                 |           | 4672.03900     |                 |           | 684301         |                 |           | 685377         |                 |       |
|                      | % of study area | Area of overlap (ha) | % of link area    | % of LULC area | Area (ha) | % of link area | % of total LULC | Area (ha) | % of link area | % of total LULC | Area (ha) | % of link area | % of total LULC | Area (ha) | % of link area | % of total LULC |       |
| Forest (incl. parks) | 1654215         | 76.65                | 2.44              | 28.47          | 1.47e-04  | 31.28          | 0.66            | 1.89e-03  | 29.11          | 0.62            | 1.76e-03  | 621652.40      | 90.84           | 37.58     | 624572.00      | 91.13           | 37.76 |
| Park                 | 255964          | 11.86                | 0.37              | 4.31           | 1.44e-04  | 14.13          | 0.30            | 0.01      | 14.04          | 0.30            | 0.01      | 100349.60      | 14.66           | 39.20     | 100349.60      | 14.64           | 39.20 |
| Grassland            | 147610          | 6.84                 | 0.24              | 2.75           | 1.59e-04  | 43.72          | 0.92            | 0.03      | 42.58          | 0.91            | 0.03      | 2543.49        | 0.37            | 1.72      | 2543.49        | 0.37            | 1.72  |
| Shrub                | 124953          | 5.79                 | 0.02              | 0.18           | 1.27e-05  | 0.64           | 0.01            | 5.15e-04  | 0.64           | 0.01            | 5.15e-04  | 2481.88        | 0.36            | 1.99      | 2481.88        | 0.36            | 1.99  |
| Agriculture          | 79769           | 3.70                 | 5.97              | 69.71          | 0.01      | 4652.62        | 98.01           | 5.83      | 4579.59        | 98.02           | 5.74      | 150.98         | 0.02            | 0.19      | 150.98         | 0.02            | 0.19  |
| Water                | 64272           | 2.98                 | 0.27              | 3.19           | 4.25e-04  | 0.50           | 0.01            | 7.84e-04  | 0.50           | 0.01            | 7.84e-04  | 2057.04        | 0.30            | 3.20      | 2057.04        | 0.30            | 3.20  |
| Residential          | 34897           | 1.62                 | 0.01              | 0.08           | 1.86e-05  | 12.32          | 0.26            | 0.04      | 12.02          | 0.26            | 0.03      | 124.52         | 0.02            | 0.36      | 124.52         | 0.02            | 0.36  |
| Rock / exposed       | 27373           | 1.27                 | 0.05              | 0.53           | 1.64e-04  | 5.40           | 0.11            | 0.02      | 5.11           | 0.11            | 0.02      | 291.40         | 0.04            | 1.06      | 291.40         | 0.04            | 1.06  |
| Wetland              | 18207           | 0.84                 | 0.16              | 1.92           | 9.02e-04  | 3.83           | 0.08            | 0.02      | 3.82           | 0.08            | 0.02      | 12387.53       | 1.81            | 68.04     | 12387.53       | 1.81            | 68.04 |
| Urban                | 6187            | 0.29                 | 0                 | 0              | 0         | 2.02           | 0.04            | 0.03      | 1.97           | 0.04            | 0.03      | 14.73          | 2.15e-03        | 0.24      | 14.73          | 2.15e-03        | 0.24  |
| Unknown              | 1291            | 0.06                 | 0                 | 0              | 0         | 0              | 0               | 0         | 0              | 0               | 0         | 0              | 0               | 29.40     | 4.29e-03       | 2.28            |       |

2039



## 2040 **Appendix References**

- 2041 Agudelo C. A. R., S. L. H. Bustos, and C. A. P. Moreno. 2020. Modeling  
2042 interactions among multiple ecosystem services. A critical review. *Ecological*  
2043 *Modelling* **429**:109103. <https://doi.org/10.1016/j.ecolmodel.2020.109103>
- 2044 Boerema A., A. J. Rebelo, M. B. Bodi, K. J. Esler, and P. Meire. 2017. Are  
2045 ecosystem services adequately quantified? *Journal of Applied Ecology*  
2046 **54(2)**:358-370. <https://doi.org/10.1111/1365-2664.12696>
- 2047 Burkhard B., F. Kroll, S. Nedkov, and F. Müller. 2012. Mapping ecosystem  
2048 service supply, demand and budgets. *Ecological Indicators* **21**:17-29.  
2049 <https://doi.org/10.1016/j.ecolind.2011.06.019>
- 2050 ESRI. 2011. ArcGIS Desktop. Redlands, CA: Environmental Systems Research  
2051 Institute. **Release 10**.
- 2052 Field R. D. 2021. Mapping the functional connectivity of ecosystem services  
2053 supply across a regional landscape - Data and scripts. *Open Science*  
2054 *Framework* <https://doi.org/10.17605/OSF.IO/9S4RM>
- 2055 Field R, Kyle C, Pedersen S, Parrott L. Ecosystem Services Mapping to Support  
2056 Environmental Conservation Planning Decisions in the Okanagan Region:  
2057 Year 1 Progress Report. Kelowna, BC: Prepared by: Okanagan Institute for  
2058 Biodiversity, Resilience and Ecosystem Services (BRASES), Prepared for:  
2059 Environment and Climate Change Canada.; 2017. Report nr GCXE17P178.  
2060 39 p.
- 2061 Field R. D., L. Parrott. 2017. Multi-ecosystem services networks: A new  
2062 perspective for assessing landscape connectivity and resilience. *Ecological*  
2063 *Complexity* **32**:31-41. <https://doi.org/10.1016/j.ecocom.2017.08.004>
- 2064 FLNRO (BC Ministry of Forests, Lands and Natural Resource Operations). 2017.  
2065 Freshwater Atlas. BC Data Catalogue. <https://data.gov.bc.ca/>
- 2066 Gos P., S. Lavorel. 2012. Stakeholders' expectations on ecosystem services  
2067 affect the assessment of ecosystem services hotspots and their congruence  
2068 with biodiversity. *International Journal of Biodiversity Science, Ecosystem*  
2069 *Services & Management* **8(1-2)**:93-106.  
2070 <https://doi.org/10.1080/21513732.2011.646303>
- 2071 Hamel P., B. P. Bryant. 2017. Uncertainty assessment in ecosystem services  
2072 analyses: seven challenges and practical responses. *Ecosystem Services*  
2073 **24**:1-15. <https://doi.org/10.1016/j.ecoser.2016.12.008>



- 2074 Haughian S. R., P. J. Burton, S. W. Taylor, and C. Curry. 2012. Expected effects  
2075 of climate change on forest disturbance regimes in British Columbia. *BC*  
2076 *Journal of Ecosystems and Management* **13(1)**:1-24.
- 2077 Hou Y., B. Li, F. Müller, Q. Fu, and W. Chen. 2018. A conservation decision-  
2078 making framework based on ecosystem service hotspot and interaction  
2079 analyses on multiple scales. *Science of the Total Environment* **643**:277-291.  
2080 <https://doi.org/10.1016/j.scitotenv.2018.06.103>
- 2081 Kolosz B., I. Athanasiadis, G. Cadisch, T. Dawson, C. Giupponi, M. Honzák, J.  
2082 Martinez-Lopez, A. Marvuglia, V. Mojtahed, and K. B. Ogutu. 2018.  
2083 Conceptual advancement of socio-ecological modelling of ecosystem  
2084 services for re-evaluating Brownfield land. *Ecosystem Services* **33**:29-39.  
2085 <https://doi.org/10.1016/j.ecoser.2018.08.003>
- 2086 Kyle C. 2018. Chinese and Japanese Market Gardening in the North and Central  
2087 Okanagan Valley, British Columbia. *BC Studies: The British Columbian*  
2088 *Quarterly* **200**:241-272.
- 2089 MEA (Millennium Ecosystem Assessment). 2005. Ecosystems and human well-  
2090 being. Island Press, Washington, DC.
- 2091 MoAg (BC Ministry of Agriculture). 2017. Agricultural Land Use Inventory (ALUI)  
2092 dataset. Strengthening Farming, Abbotsford, BC.
- 2093 Okanagan Valley Economic Development Society (OVEDS). 2013. Economic  
2094 Profile Okanagan Valley Kelowna, BC, Canada. Okanagan Valley Economic  
2095 Development Society, Kelowna, BC.
- 2096 Qiu J., M. G. Turner. 2013. Spatial interactions among ecosystem services in an  
2097 urbanizing agricultural watershed. *Proceedings of the National Academy of*  
2098 *Sciences of the United States of America* **110**:12149-12154.
- 2099 R Development Core Team. 2013. R: A language and environment for statistical  
2100 computing. R Foundation for Statistical Computing, Vienna, Austria.  
2101 <http://www.R-project.org/>
- 2102 Seppelt R., C. F. Dormann, F. V. Eppink, S. Lautenbach, and S. Schmidt. 2011. A  
2103 quantitative review of ecosystem service studies: approaches, shortcomings  
2104 and the road ahead. *Journal of Applied Ecology* **48(3)**:630-  
2105 636. <https://doi.org/10.1111/j.1365-2664.2010.01952.x>
- 2106 Stritih A., P. Bebi, and A. Grêt-Regamey. 2019. Quantifying uncertainties in earth  
2107 observation-based ecosystem service assessments. *Environmental*  
2108 *modelling & software* **111**:300-310.  
2109 <https://doi.org/10.1016/j.envsoft.2018.09.005>

- 2110 Wang Y., X. Li, Q. Zhang, J. Li, and X. Zhou. 2018. Projections of future land use  
2111 changes: Multiple scenarios-based impacts analysis on ecosystem services  
2112 for Wuhan city, China. *Ecological Indicators* **94(1)**:430-445.  
2113 <https://doi.org/10.1016/j.ecolind.2018.06.047>
- 2114 Zhang W., T. H. Ricketts, C. Kremen, K. Carney, and S. M. Swinton. 2007.  
2115 Ecosystem services and dis-services to agriculture. *Ecological Economics*  
2116 **64(2)**:253-260. <https://doi.org/10.1016/j.ecolecon.2007.02.024>
